# Supplementary material
Source: PubMed Central journal article supplement (PMC6107069)
Supplement: NIHMS977825-supplement-1.pdf [file NIHMS977825-supplement-1.pdf]

**A**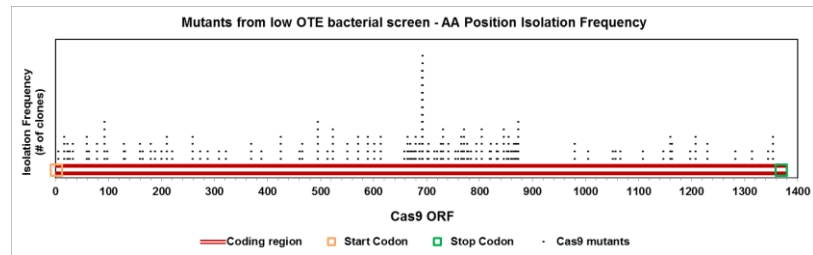**B**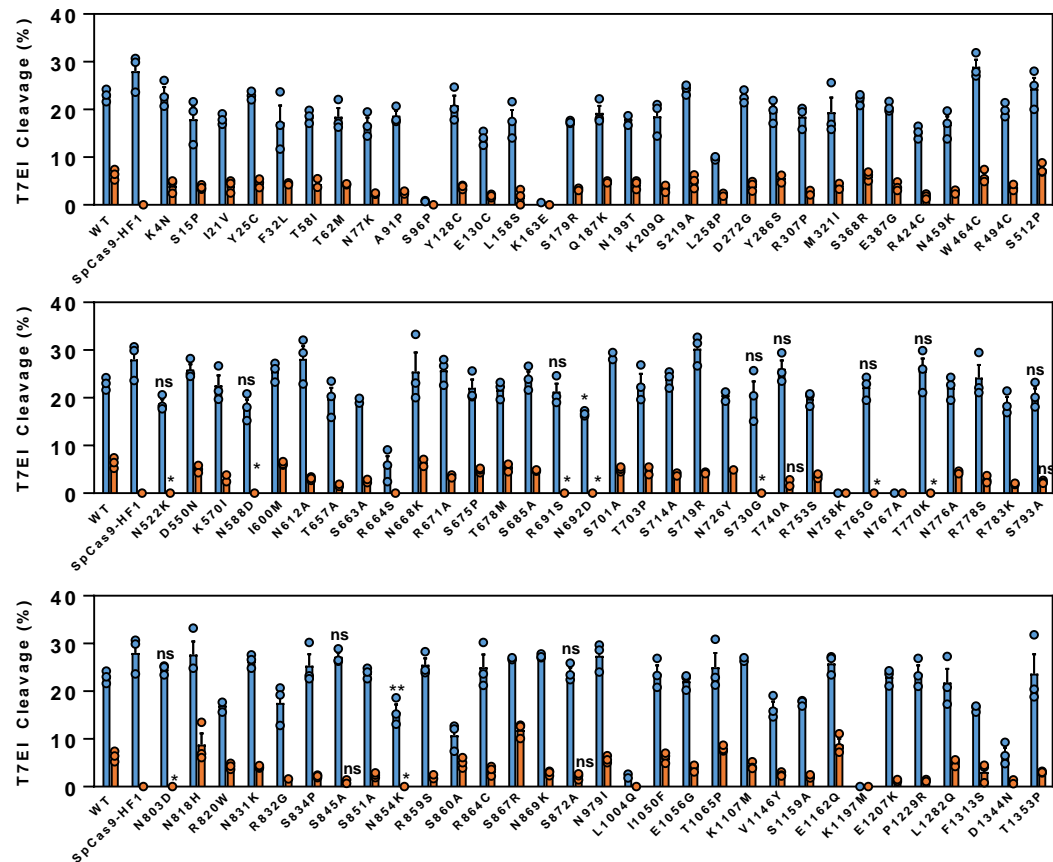**C**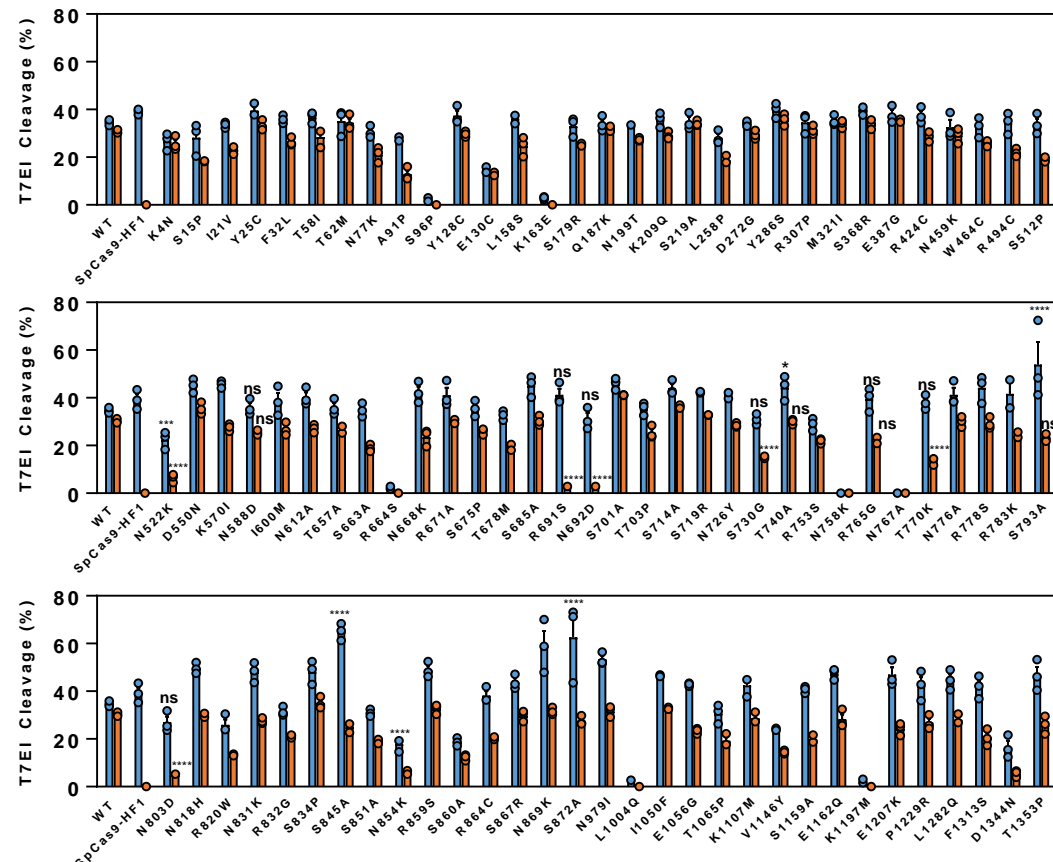

**Supplementary Figure 1 – Bacterial dual selection screen identifies point mutations in Cas9 that reduce off-target editing.** (A) Location and frequency of Cas9 amino acid positions where selected mutants maintained on-target potency and reduced off-target editing. Only substitution-bearing positions that were isolated  $\geq 2$  times were plotted. The Cas9 open reading frame is plotted on the x-axis and the frequency of mutation at each position was plotted on the y-axis. In total, 250,000 clones were screened from a mutant library using guides and target sites first with *VEGFA3*, and secondarily with *EMX1*. Plasmids were purified from 163 surviving colonies and the *cas9* was sequenced revealing 94 positions where substitution mutations were isolated at least twice. (B-C) On- and off-target editing efficiencies of plasmid-borne Cas9 mutations delivered into HEK293 cells with gRNA complexes targeting the *EMX1* (B) or *HEKSite4* (C) loci. Each of 94 low off-target substitution mutations isolated from the bacterial selection screen were created in the context of a Cas9 human expression plasmid using site-directed mutagenesis. The most frequently-isolated mutation at each position was carried forward for testing into human cells. Blue bars represent editing at the intended on-target sites for *EMX1* (B - GAGTCCGAGCAGAAGAAGAGGG) and *HEKSite4* (C - GGCAGTGC GGCTGGAGGTGGGGG), whereas orange bars represent editing at known, problematic off-target sites for the *EMX1* (B – GAGTTAGACAGAAGAAGAAAGG) and *HEKSite4* (C – GGCACGACGGCTGGAGGTGGGGG) loci. DNA was extracted 48 hrs post-transfection and editing efficiencies were calculated using PCR followed by T7E1 mismatch detection. Error bars represent mean  $\pm$  s.e.m., n=3 independent experiments. Statistical comparisons were made to WT Cas9 for On and Off target activity. \*P<.05, \*\*P<.01, \*\*\*P<.001, \*\*\*\*P < 0.0001, NS (not significant) = P  $\geq$  0.05, two-way analysis of variance (ANOVA) and Tukey's multiple comparison test

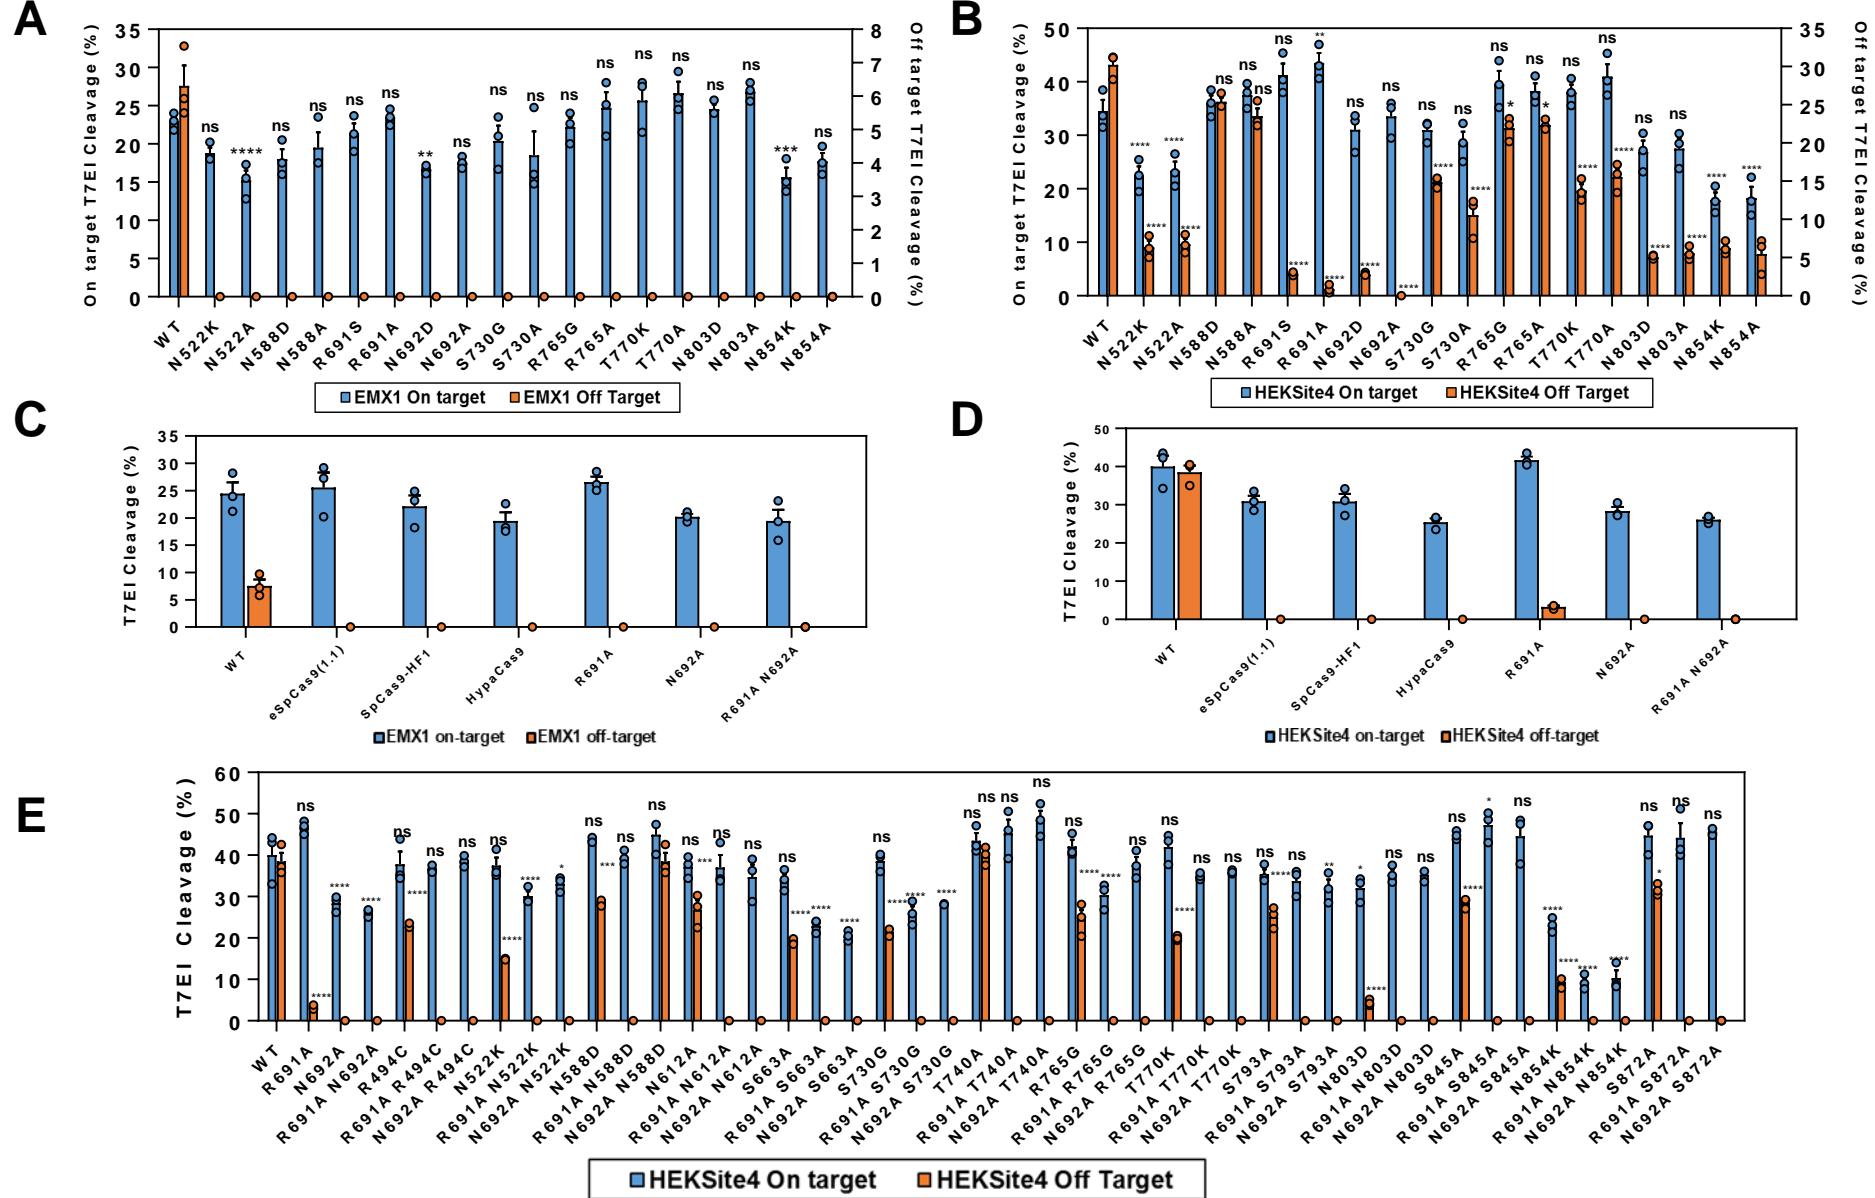

**Supplementary Figure 2 – On- and off-target performance of alanine-substituted and combined Cas9 mutations in human cells.** Previously described literature high-fidelity Cas9 mutants were also compared to R691A and N692A in the context of plasmid-based protein expression with the EMX1 (A) and HEKSite4 (B) guides. Alanine substitutions and mutant combinations were isolated by site-directed mutagenesis, and mutant plasmids were delivered into HEK293 cells by lipofection using crRNAs that target the *EMX1* (A, D) or *HEKSite4* (B-C, E) loci. Blue bars represent editing at the intended on-target sites for *EMX1* (A, D - GAGTCCGAGCAGAAGAAGAGGG) and *HEKSite4* (B-C, E - GGCACTGCGGCTGGAGGTGGGGG), whereas orange bars represent editing at known, problematic off-target sites for the *EMX1* (A, D – GAGTTAGAGCAGAAGAAGAAAGG) and *HEKSite4* (B-C, E – GGCACGACGGCTGGAGGTGGGGG) loci. DNA was extracted 48 hrs post-transfection and editing efficiencies were calculated using PCR followed by T7EI mismatch detection. Error bars represent mean  $\pm$  s.e.m., n=9 independent experiments. Statistical comparisons were made to WT Cas9 for on and off target activity. \*P<.05, \*\*P<.01, \*\*\*P<.001, \*\*\*\*P < 0.0001, NS (not significant) = P  $\geq$  0.05, two-way analysis of variance (ANOVA) and Tukey's multiple comparison test.

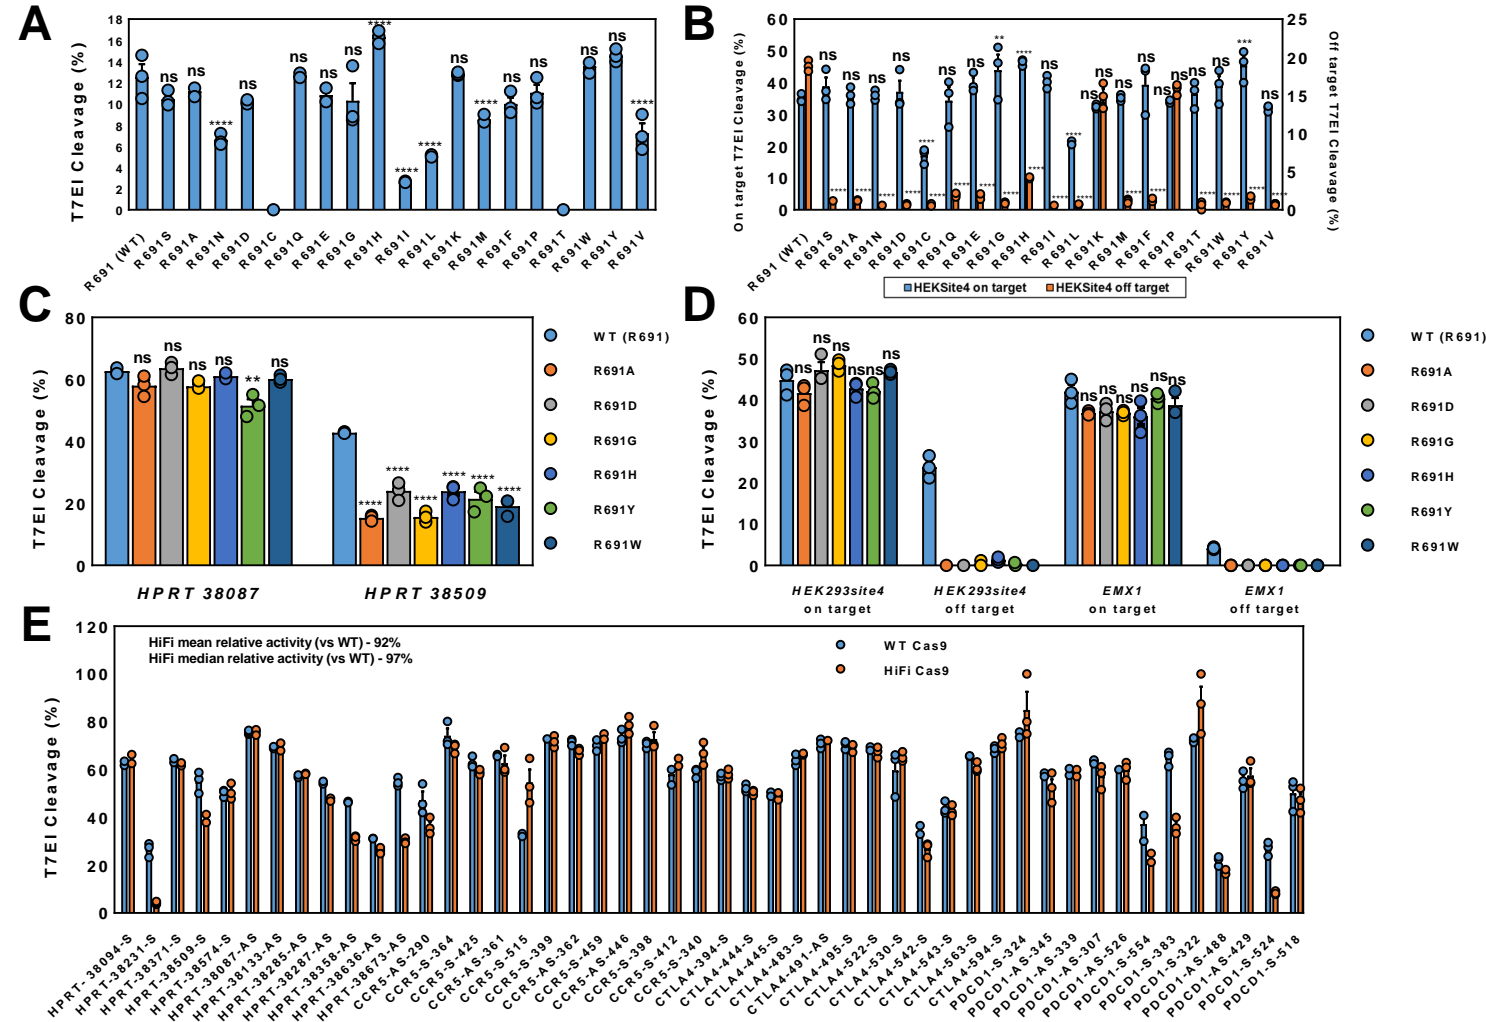

**Supplementary Figure 3 On- and off-target analysis of every possible amino acid substitution at the R691 position and overall performance of the R691A substitution by RNP.** (A-B) Alanine substitutions were isolated by site-directed mutagenesis, and mutant plasmids were delivered into HEK293 cells by lipofection using crRNAs that target the *HPRT-38509* (A) or *HEKSite4* (B) loci. Blue bars represent editing at the intended on-target sites for *HPRT-38509* (A - TTGACTATAATGAATACTTCAGG) and *HEKSite4* (B - GGCAGTGGGCTGGAGGTGGGGG), whereas orange bars represent editing at a known, problematic off-target site for the *HEKSite4* (B - GGCACGACGGCTGGAGGTGGGGG) locus. (C-D) On- and off-target analysis of the most promising R691 position substitutions delivered as RNP. WT and the indicated Cas9 proteins were complexed with gRNAs that target the *HPRT 38087* (C), *HPRT 38509* (C), *HEKSite4* (D), and *EMX1* (D) loci, and RNP complexes (10 nM) were delivered into HEK293 cells by lipofection. Total editing was assessed at the *HPRT 38087* (C - AATTATGGGATTACTAGGAAGG), *HPRT 38509* (C - TTGACTATAATGAATACTTCAGG), *HEKSite4* (D - GGCAGTGGGCTGGAGGTGGGGG) and *EMX1* (D - GAGTCCGAGCAGAAGAAGAAGGG) on-target sites, as well as at known, problematic off-target sites for the *HEKSite4* (D - GGCACGACGGCTGGAGGTGGGGG) and *EMX1* (D - GAGTTAGAGCAGAAGAAGAAGG) guides. (E) Comparison of on-target editing between WT and HiFi (R691A) Cas9 delivered as RNP with guides that target 48 different sites. DNA was extracted 48 hrs post-transfection and editing efficiencies were calculated using PCR followed by T7EI mismatch detection. Error bars represent mean  $\pm$  s.e.m., n=3 independent experiments. Statistical comparisons were made to WT Cas9 for On and Off target activity. \*\*P<.01, \*\*\*\*P < 0.0001, NS (not significant) = P  $\geq$  0.05, two-way analysis of variance (ANOVA) and Tukey's multiple comparison test.

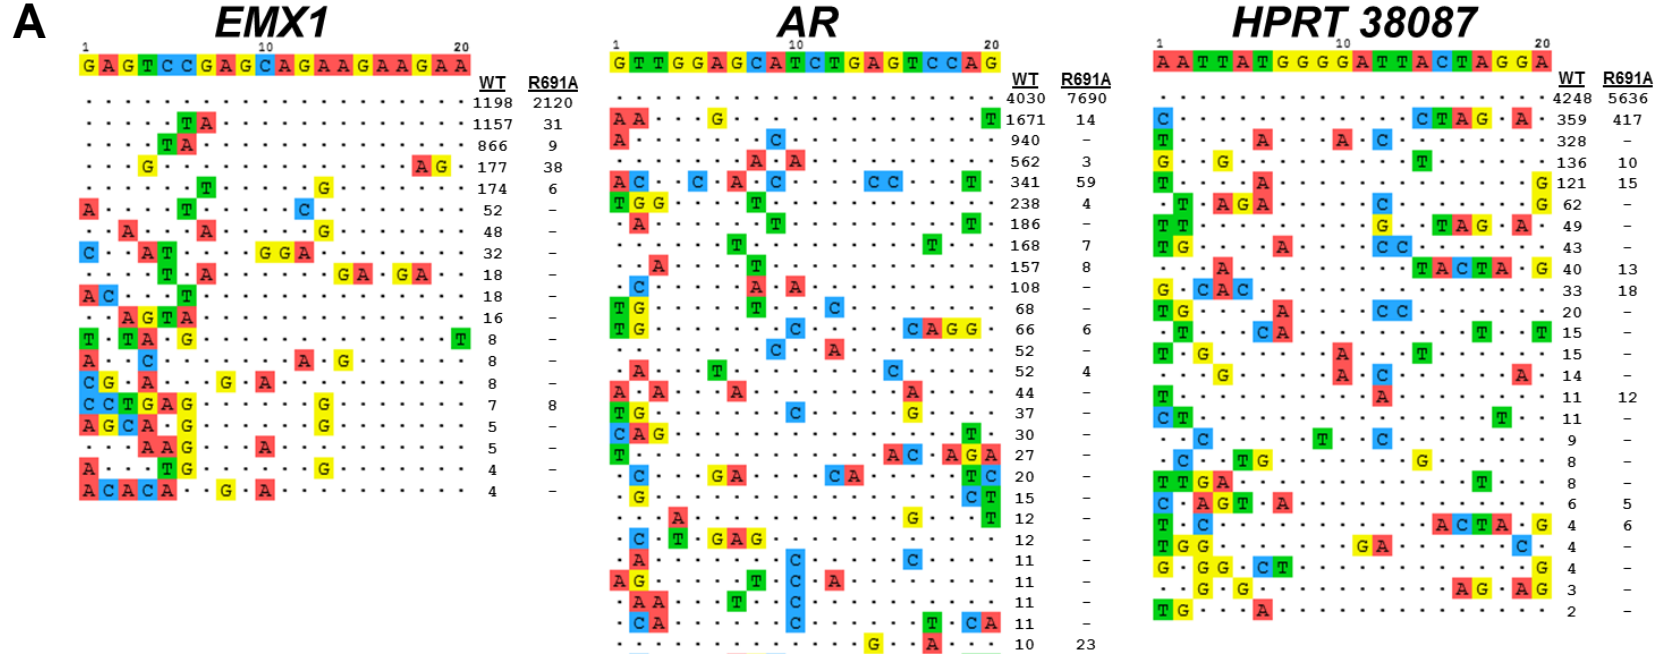

**B**

| Site         | Sequence                | Closest Gene | Distance (kb) | Feature    | hg19 Location             |
|--------------|-------------------------|--------------|---------------|------------|---------------------------|
| ON target    | CTTGCCCCACAGGGCAGTAANGG | HBB          | n/a           | Exon       | Chr11:5248198-5248220     |
| Off Target 1 | TCAGCCCCACAGGGCAGTAAGGG | GRIN3A       | 95.004        | Intergenic | Chr9:104595866-104595888  |
| Off Target 2 | GTGCCCCACAGGGCAGGAANGG  | MAGEE2       | 1.209         | Intergenic | ChrX:75006240-75006262    |
| Off Target 3 | GCTGCCCCACAGGGCAGCAANGG | FAM101A      | 3.258         | Intergenic | Chr12:124803828-124803850 |
| Off Target 4 | GATGCCATTCTAGCAGTCANCG  | C22orf34     | 225.248       | Intergenic | Chr22:49582904-49582926   |
| Off Target 5 | CTCGCCCTCAGGGCAGTAGTGG  | GREB1        | n/a           | Intron     | Chr2:11777795-11777817    |
| Off Target 6 | CCTCTCCCACAGGGCAGTAAAGG | LINC01482    | 0.034         | Intergenic | Chr17:66624239-66624261   |
| Off Target 7 | TTTCCCCAAGGGCAGTAATAG   | MYO16        | n/a           | Intron     | Chr13:109818336-109818358 |

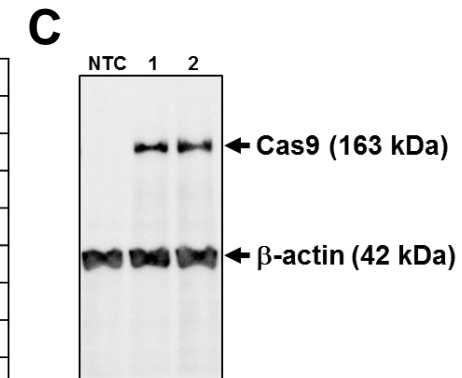

**Supplementary Figure 4 Identification of Cas9 off-target sites used for amplicon-based sequencing.** (A) Sequences of off-target sites identified by GUIDE-seq for *EMX1*, *AR*, and *HPRT 38087*. For each experiment the guide sequence is listed on top with off-target sites shown underneath and with mismatches to the on-target site indicated in color. The number of sequencing reads obtained for each site for either WT Cas9 or R691A “HiFi” Cas9 are indicated. Experiments were performed with HEK293-Cas9 or HEK293-Cas9-HiFi stable cell lines and 4  $\mu$ M gRNA complexes delivered by electroporation. (B) List of *HBB* off-target sites investigated by next generation sequencing. Presented is a list of sites investigated in **Figure 5C** that detail the mismatches, closest gene, distance to the closest gene, and the location in the reference human genome. Off-targets 1-4 are the top 4 sites identified using GUIDE-Seq (data not shown). Off-target 5 was the top hit using the MIT CRISPR design tool. Off-targets 6 and 7 are two of the top three sites identified using the COSMID algorithm. The top hit identified in COSMID is off-target 1, which was the top hit identified by GUIDE-Seq. The nucleotides highlighted in red are mismatches compared to the on-target guide sequence targeting *HBB* exon 1. (C) The R691A HiFi mutation does not influence steady-state Cas9 expression levels in a HEK293 Cas9 stable cell line. A monoclonal HEK293 cell line that stably expresses WT Cas9 was isolated and determined to have a single copy of *cas9* on the X chromosome. The R691A mutation was introduced by homology-directed repair (HDR) following Cas9 cleavage, and a monoclonal population was isolated and confirmed to have the correct sequence. Standard HEK293 (NTC), WT Cas9 (1), and HiFi Cas9 (2) cell lines were grown to confluency, and total protein samples were subjected to SDS-PAGE. Western blots were performed using a monoclonal Cas9 antibody and a  $\beta$ -actin antibody which served as a loading control. This experiment was repeated three times with similar results.

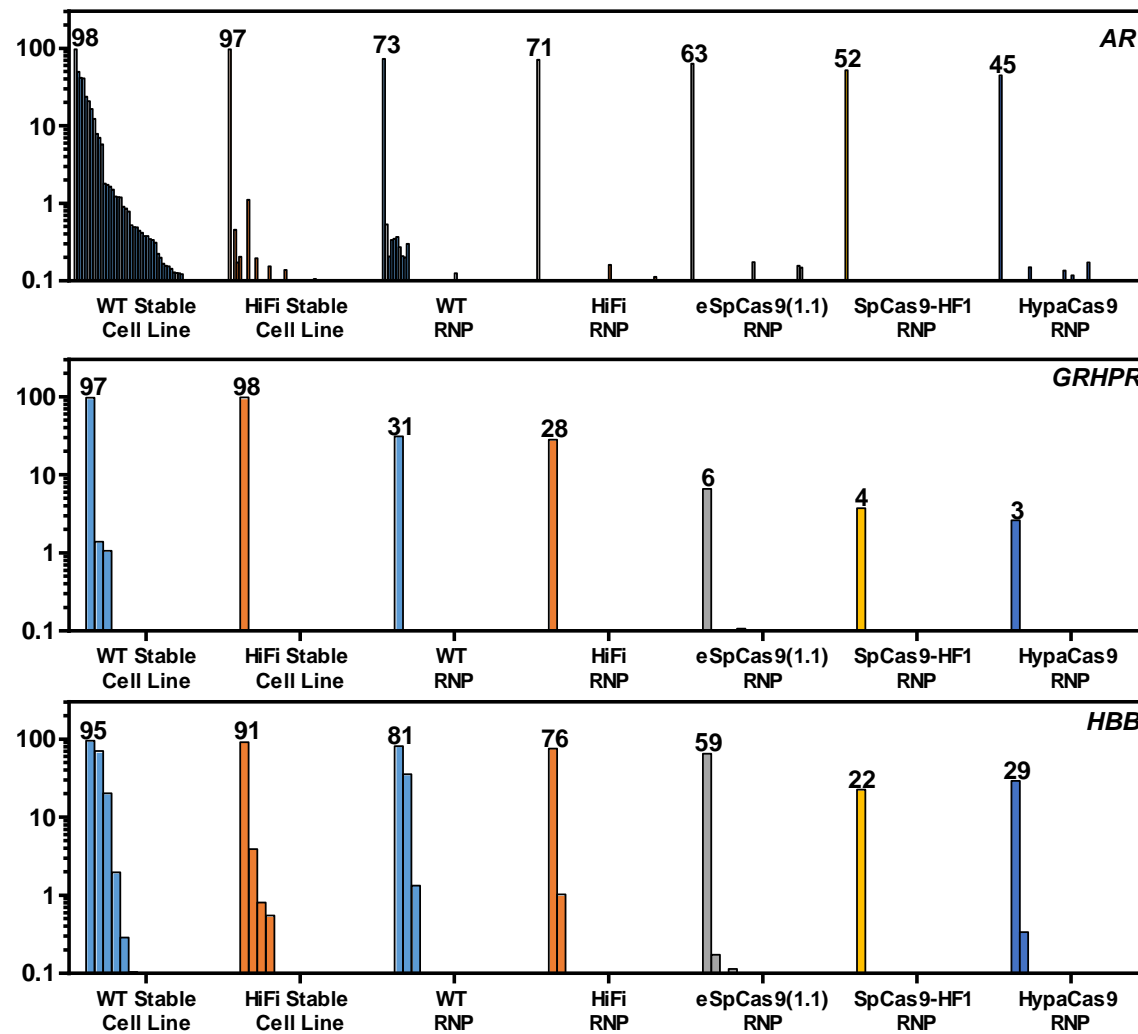

**Supplementary Figure 5 Comparison of global off-target editing facilitated by WT and high-fidelity mutant Cas9 proteins.** Total editing as determined by NGS for the *AR*, *GRHPR*, and *HBB* (top to bottom) gRNAs (4  $\mu$ M) delivered into HEK293 cells that express WT (blue) or HiFi (orange) Cas9, or complexed to WT (blue), HiFi (orange), eSpCas9(1.1) (gray), SpCas9-HF1 (yellow), or HypaCas9 (dark blue) and delivered as RNP (4  $\mu$ M) into standard HEK293 cells (left to right). INDEL formation percentages at the on-target loci are indicated directly above the on-target bars, other bars represent off-target amplicons. All amplicons are rank-ordered (highest to lowest) by INDEL formation percentage as determined for the WT Cas9 stable cell line. The Y-axis is plotted as log-10 scale.

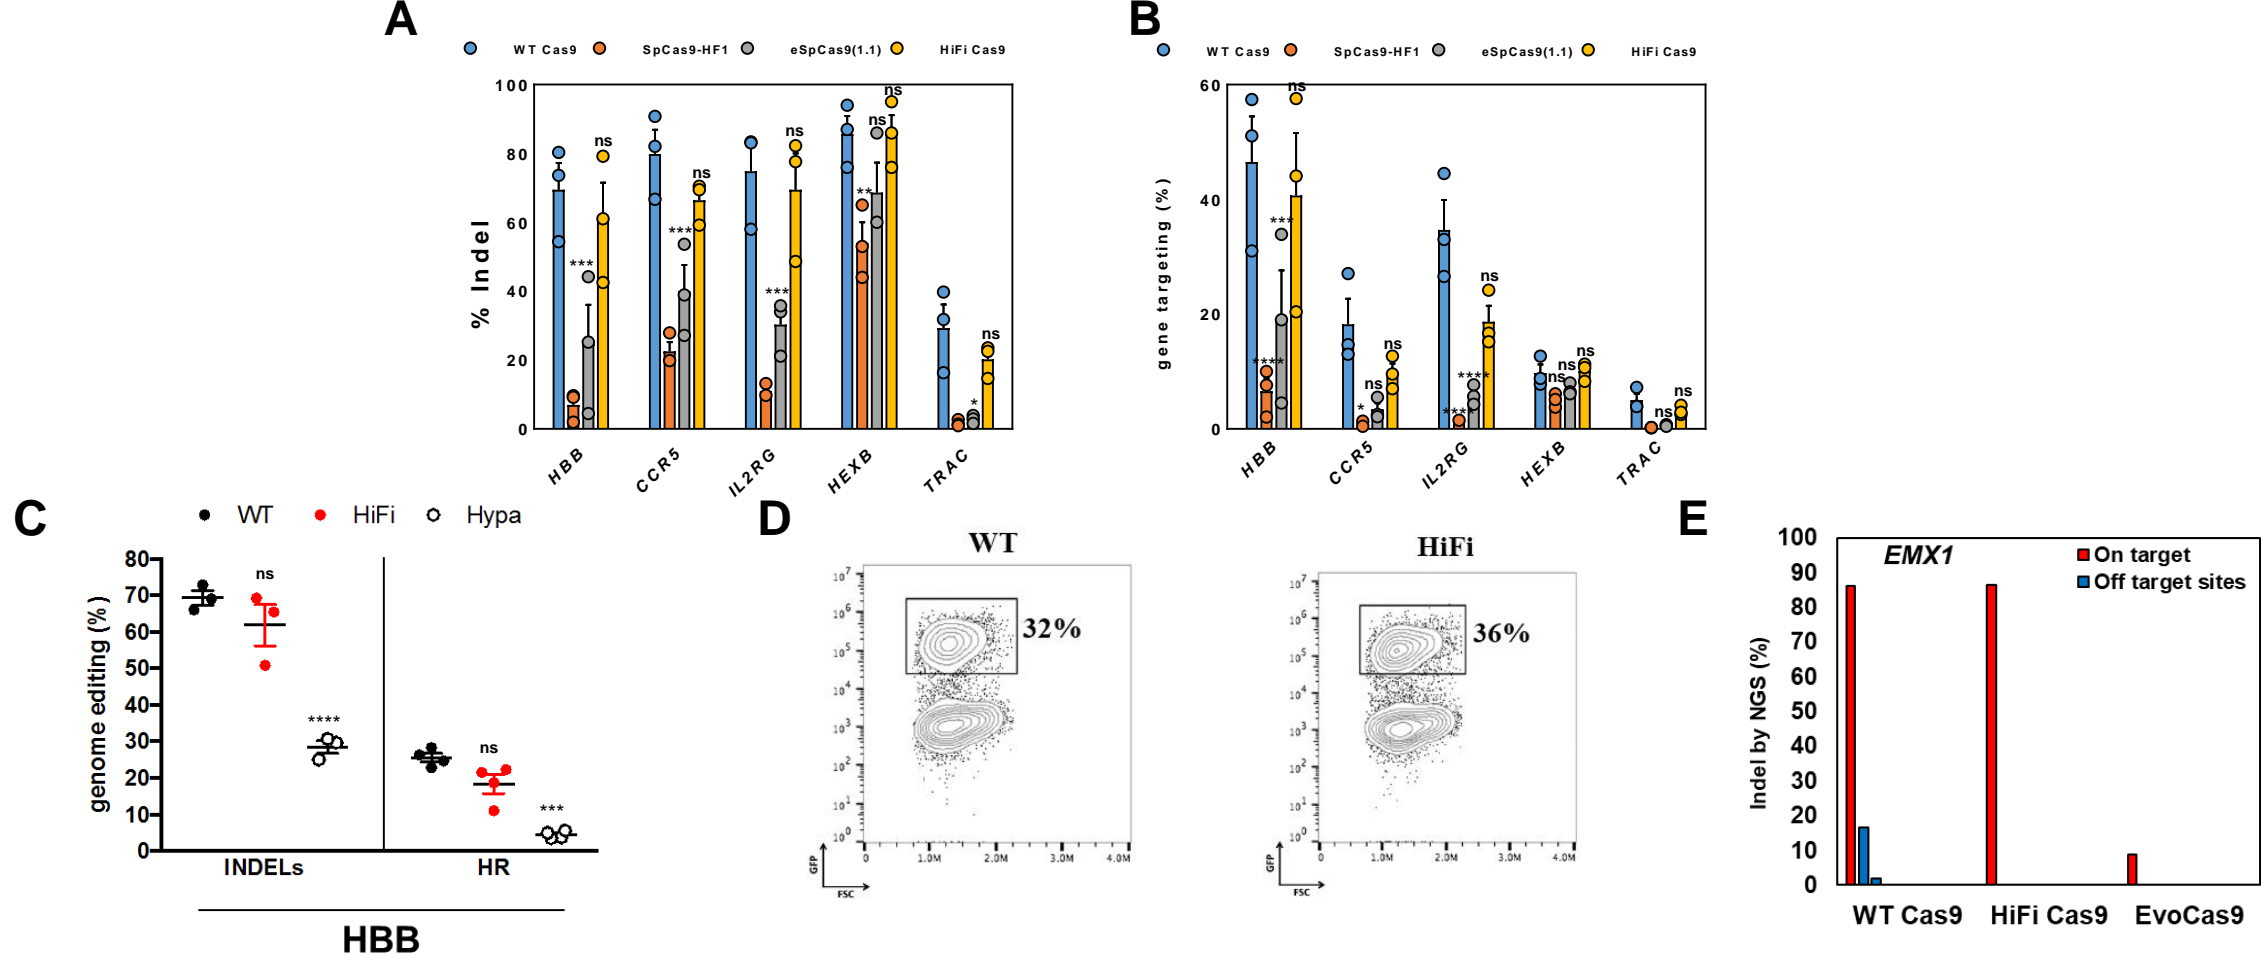

**Supplemental Figure 6 HiFi Cas9 exhibits superior INDEL formation and gene targeting in human CD34<sup>+</sup> HSCPs.** (A) The raw data, which was presented normalized to WT Cas9 in **Figure 5a**. Data shows that the HiFi version consistently induces more INDELS compared to all other high fidelity mutants. (n=3, number of data points within each group, all from different HSPC cord blood donors). Bars represent mean. (B) Data shows the raw gene targeting frequencies that are shown in main text **Fig 5b**. HR for HBB and CCR5 was measured by GFP<sup>high</sup> population, for HEXB and IL2RG HR was measured via ddPCR and for TRAC HR was measured by the tNGFR<sup>high</sup> population. (n=3, number of data points within each group, all from different HSPC cord blood donors). Bars represent mean. (C) CD34<sup>+</sup> HSCPs were targeted with either WT, HiFi, or Hypa Cas9 RNPs and then half of the cells were transduced with a AAV6 *HBB* homologous UbC-GFP donor vector. Three days after electroporation, gDNA was harvested for INDEL analysis by TIDE and the cells that were transduced with AAV6 were then harvested for FACS analysis of targeted integration of UbC-GFP into the *HBB* locus. Bars represent mean, n=3 different HSPC cord donors. (D) Representative FACS image showing HSCPs with HR of a UbC-GFP donor into the *HBB* gene. (n=3-5, number of data points within each group, all from different HSPC cord blood donors). (E) Data shows the on-target performance of the EvoCas9 mutant as compared to WT and HiFi Cas9 with a crRNA that targets the *EMX1* locus. Statistical comparisons were made to WT Cas9 for on target NHEJ and HR activity. \*P<.05, \*\*P<.01, \*\*\*P<.001, \*\*\*\*P < 0.0001, NS (not significant) = P ≥ 0.05, two-way analysis of variance (ANOVA) and Tukey's multiple comparison test. Bars represent mean.

**A**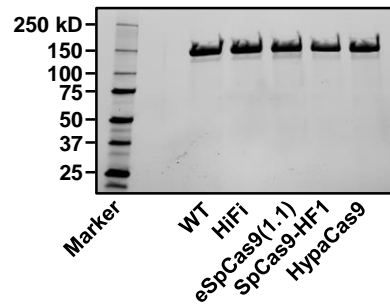**B**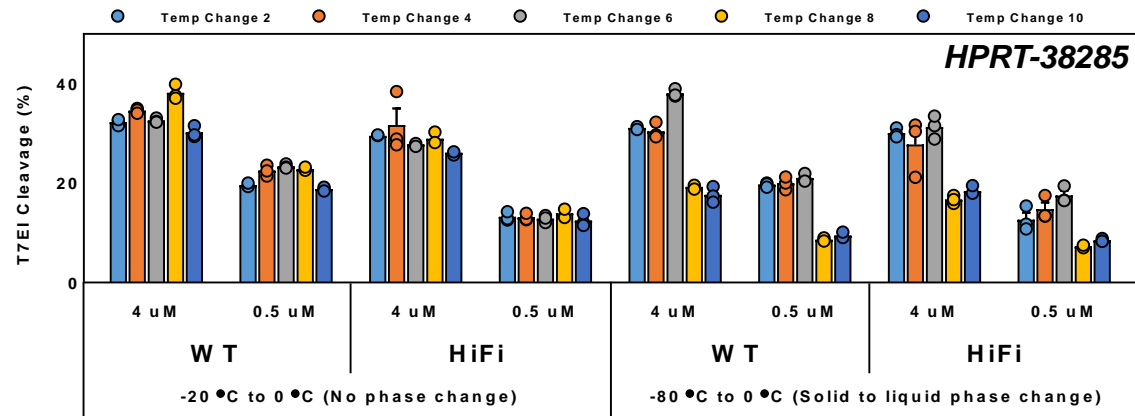**C**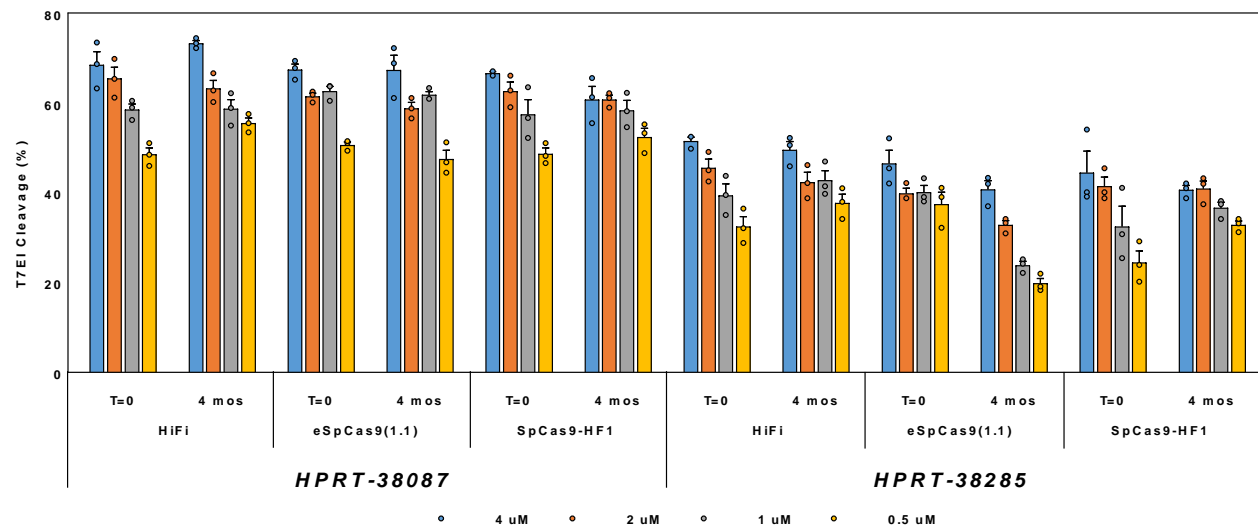

**Supplemental Figure 7. Characterization of recombinant Cas9 proteins and mutants.** (A) SDS-PAGE gel demonstrating equivalent purity (>95%) between WT Cas9 and the indicated high-fidelity mutant. This experiment was performed three times with similar results. (B) Repeated phase changes begins to reduce Cas9 activity with either WT or HiFi after 8 phase change events. Storage under conditions that avoid phase change shows no difference in activity after 10 temperature changes. (C) The HiFi, eSpCas9(1.1), and SpCas9-HF1 Cas9 mutants show no evidence of loss in activity after 4 months of storage at -20 °C in 25 mM Tris-HCl (pH 7.4), 300 mM NaCl, 0.1 mM EDTA, 1 mM DTT, and 50% glycerol. Error bars represent mean + s.e.m., n=3 independent experiments.

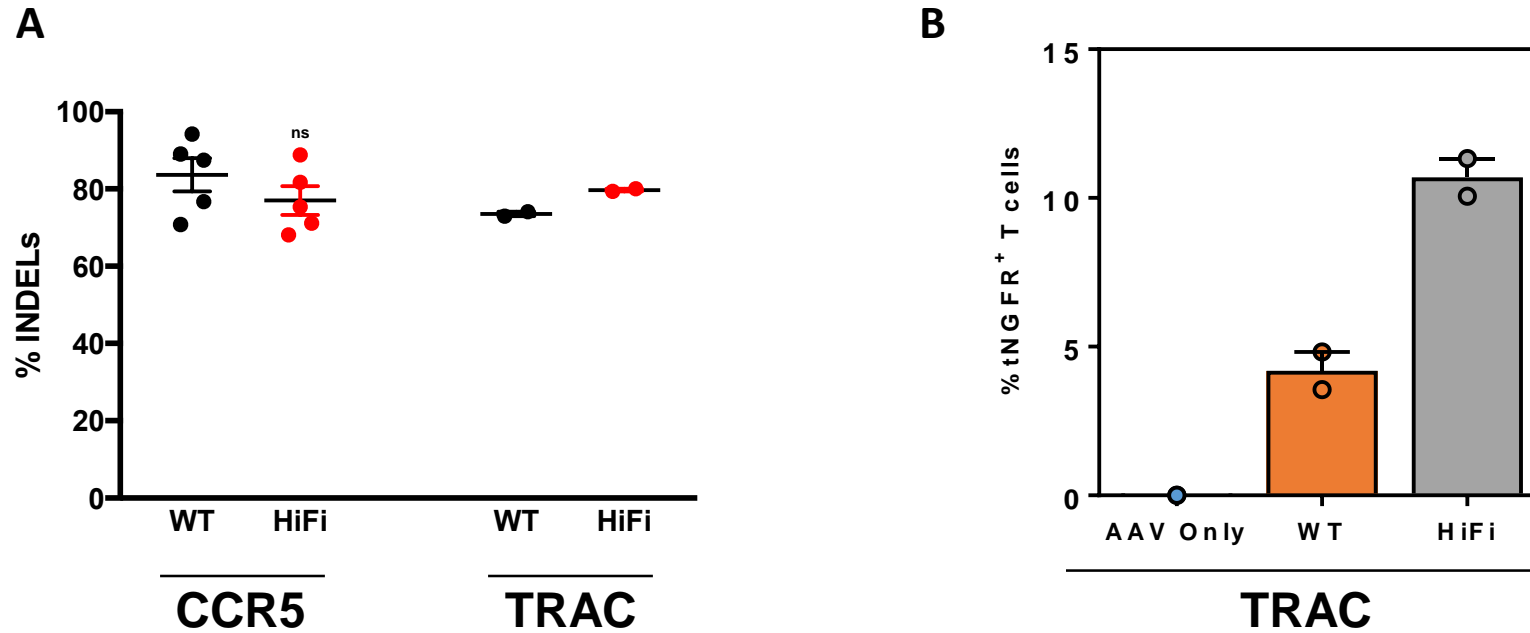

**Supplemental Figure 8. Equivalent double strand break activity of WT and HiFi Cas9 in primary human T-cells.** **A.** T-cells were harvested from buffy coats as described in the materials and methods. T-cells were activated with anti-CD3/28 beads 3 days before electroporation. The cells were resuspended in electroporation solution, mixed with the pre-complexed RNP (either targeting CCR5 or TRAC loci) and then were electroporated using a 4D-Nucleofector with program EO-115. Genomic DNA was harvested 4 days after electroporation and INDELS were calculated for each locus using TIDE software (n=2-5, number of data points within each group, all from different healthy T-cell donors). Error bars represent mean + s.e.m. NS (not significant) =  $P \geq 0.05$ , one-way analysis of variance (ANOVA) and Tukey's multiple comparison test. Statistical comparisons were made to WT Cas9 for on target NHEJ activity. **B.** Activated T-cells were targeted at the endogenous TRAC locus with an AAV6 homologous donor vector that intended to knock-in frame T2A-CD19-T2A-tNGFR. Targeted cells were harvested 4 days post electroporation and stained for CD3 and tNGFR and then were analyzed on a Cytoflex flow cytometer (n=2, number of data points within each group, all from different T-cell donors). Statistical comparisons were made to WT Cas9 for on target NHEJ and HR activity. NS (not significant) =  $P \geq 0.05$ , one-way analysis of variance (ANOVA) and Tukey's multiple comparison test. Bars represent mean.



| Plasmid                             | Description                                                                                                  | Primers / Fragments           |
|-------------------------------------|--------------------------------------------------------------------------------------------------------------|-------------------------------|
| pUC19                               | High copy routine cloning vector – Cb <sup>R</sup>                                                           | N/A                           |
| pIDTV-CcdB                          | pUC19 with lacYA177C and araC-PBAD-ccdB – Cb <sup>R</sup>                                                    | lacYA177C and araC-PBAD-ccdB  |
| pIDTV-CcdB-V3                       | pIDTV-CcdB with the VEGFA3 on target site introduced by SDM – Cb <sup>R</sup>                                | VEGFA3top-VEGFA3btm           |
| pIDTV-CcdB-EMX1                     | pIDTV-CcdB with the EMX1 on-target site introduced by SDM - Cb <sup>R</sup>                                  | ccdBemx1top-ccdBemx1btm       |
| pACYCduet-1                         | Dual T7 promoter expression plasmid based on pACYC184 from Novagen - Cm <sup>R</sup>                         | N/A                           |
| pIDTV-V3sg-off1                     | Cas9, VEGFA3 sgRNA, and VEGFA3 off target site cloned into NcoI/SacI/PstI of pACYCduet-1 – Cm <sup>R</sup>   | usecncocas-dsecsaccas, V3off1 |
| pIDTV-EXsg-off1                     | Cas9, EMX1 sgRNA, and EMX1 off target site cloned into NcoI/SacI/PstI of pACYCduet-1 – Cm <sup>R</sup>       | usecncocas-dsecsaccas, EXoff1 |
| Alt-R® S.p. Cas9 Expression Plasmid | Commercial Cas9 expression plasmid with mammalian promoter and NLS sequences – Cb <sup>R</sup>               | N/A                           |
| GeneArt® CRISPR Nuclease Vector     | Commercial Cas9 expression plasmid with mammalian promoter and NLS sequences – Cb <sup>R</sup>               | N/A                           |
| pCDNA™3.1(-)                        | Commercial expression plasmid with mammalian promoter and NLS sequences – Cb <sup>R</sup> , Neo <sup>R</sup> | N/A                           |
| pIDTG-Hs-Int-SpCas9                 | pCDNA3.1(-) with Cas9 ORF and NLS sequences for Hs integration – Cb <sup>R</sup> , Neo <sup>R</sup>          | N/A                           |
| pET28b                              | <i>E. coli</i> protein expression plasmid – T7 Promoter – CTD His6 – Kn <sup>R</sup>                         | N/A                           |
| pIDTV-NLS-C9-2NLS-H                 | T7 driven NLS-Cas9-NLS-NLS-HIS6 pET28 plasmid - Kn <sup>R</sup>                                              | NLS-Cas9-NLS-NLS              |

**Supplemental Table 1 Description of plasmids**

| Oligo Name                        | Oligo Sequence                                                                   | T7EI Annealing Temp (°C) |
|-----------------------------------|----------------------------------------------------------------------------------|--------------------------|
| VEGFA3top                         | ATGTTCTGGGGAATATAATCTAGAGGTGAGTGAGTGTGTGCGTGTGGAAGCTTGGCTGTTTTGGCGGATGAG         | 64                       |
| VEGFA3btm                         | CTCATCCGCCAAAACAGCCAAGCTTCCACACGCACACACTCACTCACCTCTAGATTATATTTCCCAGAACAT         |                          |
| ccdBemx1top                       | ATGTTCTGGGGAATATAATCTAGAGAGTCCGAGCAGAAGAAGAAGGGAAGCTTGGCTGTTTTGGCGGATGAG         | N/A                      |
| ccdBemx1btm                       | CTCATCCGCCAAAACAGCCAAGCTTCCCTTCTTCTTCTGCTCGGACTCTCTAGATTATATTTCCCAGAACAT         |                          |
| usecncocas                        | ACATCAGCACCATGGACAAAAAGTACTCTATTGGCCTGGATATC                                     | N/A                      |
| Dsecsaccas                        | CAGTCACAGGAGCTCTTAATCCCCACCTAATTGGCTAAGGTCGATACG                                 | N/A                      |
| HiFi HDR Donor                    | AAGGTCAAGCTGTCATCGTGAATCAGCTGCATGAAGTTGGCGTTGGCGAAGCCGTCGGACTTCAGGAAATCCAGGATGGT | N/A                      |
| <i>HPRT</i> T7EI FWD              | AAGAATGTTGTGATAAAAAGGTGATGCT                                                     | 67                       |
| <i>HPRT</i> T7EI REV              | ACACATCCATGGGACTTCTGCCTC                                                         |                          |
| <i>CTLA4</i> T7EI FWD             | AGAGCCAGGTCTTCTGTTTGTC                                                           | 67                       |
| <i>CTLA4</i> T7EI REV             | GTTAGCACTCCAGAGCGAGAG                                                            |                          |
| <i>PDCD1</i> T7EI FWD             | AGGCTCTTAGTAGGAAATCAGGG                                                          | 67                       |
| <i>PDCD1</i> T7EI REV             | ACCACCAGGGTTTGGAAGT                                                              |                          |
| <i>EMX1</i> ontrgt T7EI FWD       | CCACTCTGTGAAGAAGCGATTA                                                           | 64                       |
| <i>EMX1</i> ontrgt T7EI REV       | CTTCCCTATGTCTAGCCTGTTTC                                                          |                          |
| <i>EMX1</i> offtrgt1 T7EI FWD     | TCACGAGCTGTCATGAGGT                                                              | 64                       |
| <i>EMX1</i> offtrgt1 T7EI FWD     | TGTCTTCCAGGAATGTGAAGTG                                                           |                          |
| <i>VEGFA3</i> ontrgt T7EI FWD     | CCAGATGGCACATTGTCAGA                                                             | 64                       |
| <i>VEGFA3</i> ontrgt T7EI REV     | GGAGCAGGAAAGTGAGTTAC                                                             |                          |
| <i>VEGFA3</i> offtrgt1 T7EI FWD   | AGGACTCACGTCGCTCTC                                                               | 64                       |
| <i>VEGFA3</i> offtrgt1 T7EI FWD   | GGTCTGCGGACTACGACT                                                               |                          |
| <i>HEKSite4</i> ontrgt T7EI FWD   | CTGAGATCCTGTCCTTAGTTTACTG                                                        | 64                       |
| <i>HEKSite4</i> ontrgt T7EI REV   | TTTCAACCCGAACGGAGAC                                                              |                          |
| <i>HEKSite4</i> offtrgt3 T7EI FWD | GGGGAGCCTGAGAGGCCATTGTCAC                                                        | 68                       |
| <i>HEKSite4</i> offtrgt3 T7EI FWD | TACGGGGCCACCCTGAGCGCTGACT                                                        |                          |

**Supplemental Table 2 – Cloning and HDR oligos**

| Oligo Name   | Oligo Sequence                            | Oligo Name   | Oligo Sequence                            | Oligo Name         | Oligo Sequence                                   | Oligo Name         | Oligo Sequence                                |                                        |
|--------------|-------------------------------------------|--------------|-------------------------------------------|--------------------|--------------------------------------------------|--------------------|-----------------------------------------------|----------------------------------------|
| Hs_K4N_top   | GTGCCCTGGCCGCAAAAATAATGAGCATTCGGCCCTTGAT  | Hs_K4N_btm   | ATCAAGGCCGATGCTGTAAATTTTTTGTGGCCCGCAGGCAC | Hs_R778S_top       | AAGGGCCAGAAGAACAGAGACGGCAGTGAAGAAAGATC           | Hs_R778S_btm       | GATCCTTTTTCATGCCTCGCTGCTGTCTTCTTCCGCTT        |                                        |
| Hs_s15F_top  | CTTGTATATCCGCACCAATCCCTGTAGCTGGCCGTTATC   | Hs_s15F_btm  | GATAACGGCCCGACGCCAACTGGTTCGCGCCATCAAG     | Hs_R783K_top       | AGCCGGGAGCCGATGAAAAGAGCTCAGGAGGATATCAAG          | Hs_R783K_btm       | CTTGATACCCTCTCGATCTTTTTCATCCGCTCCGCCGT        |                                        |
| Hs_121V_top  | AGCGTGGGCTGGGCGTGTGTACACAGCAATAACAAGGTA   | Hs_121V_btm  | TACCTTGATATTCGTCTGTGACAAACGGCCAGCCACGCT   | Hs_S793A_top       | GGTATCAAGGAACCTGGAGCCGACATCCTCAAGAAGAC           | Hs_S793A_btm       | GTGCTCTTTAGGATCTGGGCTCCGAGTTCCTGTGATACC       |                                        |
| Hs_Y25C_top  | CGCGTGTATCACAGCAAGTGTCAAGGTACCAGCAAGAAG   | Hs_Y25C_btm  | CTTCTTGTGCTGGTACCCTTCAATTCGTCTGTGATAACGGC | Hs_N803D_top       | AAAGAGCAACCCCTGGAGGACACCAGCTCCAGAAAGCAG          | Hs_N803D_btm       | CTCGTTCTGGAGCTGGGTCTCCACCGAGGTGTCTTTT         |                                        |
| Hs_F32L_top  | AAGGTATCCCGAGAAGAATGAAGGTTCGGGAATACA      | Hs_F32L_btm  | TGATATCCCGACACCTTCACTTCTTCGTTGGGTACTT     | Hs_N818H_top       | TACCTGTACTACCTGGACACGGCAGGACATGACCTG             | Hs_N818H_btm       | AACGTACATGTCTCCCTGGGCTCTCAGGAGTAGTACAGTA      |                                        |
| Hs_T58I_top  | CTGTTTGACTCAGCCGAGATCGCCGAGGCCACCAGTTG    | Hs_T58I_btm  | CAACCTGGTGGCCTCGGCATCTCGCCTGAGTCAAACAG    | Hs_R820W_top       | TACTACCTGCAGAACCCTGGGACATGACCTGTACCAG            | Hs_R820W_btm       | CTGGTCAACGTCACATGTCACCAGCCCTCTGCAGGTAGTA      |                                        |
| Hs_T62M_top  | GGCGAGACCCCGGAGGCATGAGTGTGAAGAGGACCCGCA   | Hs_T62M_btm  | TCGGGTCTCTTCAACACTTATGGCCTCGGGGTCTCGCC    | Hs_N831K_top       | CAGCCAGGATGTGGACATCAAAAGGCTTTCACAGATATGAC        | Hs_N831K_btm       | GTCATAGTCTGAAGGCTTTGTGATTCACCATCTCTGGCT       |                                        |
| Hs_N77K_top  | AGGTACACCCCGAGGAAGAAAGGATCTGCCTATCTGCAG   | Hs_N77K_btm  | CTGCAGATAGCAGATCCTTTCTTCTCCCGGGGTGTACCT   | Hs_R832G_top       | GACAGGTGTGACATCAACGGCTTTACAGATATGACGTG           | Hs_R832G_btm       | CACGTACATAGTCAAGCCGCTGTGATGTCCAACTCCGT        |                                        |
| Hs_A91F_top  | ATCTTCAGCAACAGAGATGCCCAAGTGGACAGACGCTTC   | Hs_A91F_btm  | GAAGCTGTGCTCCACCCTTTGGGACATCTGTTGTGAAGAT  | Hs_S834P_top       | TTGGACATCAACAGGCTTCCAGACATGACGTGGATACG           | Hs_S834P_btm       | GTGATCCAGCTCATAGTTCGGAAAGCCCTGTGATGTCCAA      |                                        |
| Hs_S96F_top  | ATGGCCAAGGTGCCACCCCTTCTTCACACAGCTGGAG     | Hs_S96F_btm  | CTCCAGCCTGTGGAAGAAAGGGTCTGCCACTTGGCCAT    | Hs_S845A_top       | GATCACATAGTCCCCAGGCTTTCTTAAAGCACATGAC            | Hs_S845A_btm       | GCTACTGCTTTTAAAGAAAGCCGTCGGGCACTATGTGATC      |                                        |
| Hs_Y128C_top | ATAGTCTGACGAGGTTCGTTTGTCACGAGGATCCCCACC   | Hs_Y128C_btm | GGTGGGGTACTTCTCGTGAACGAGCCACTCGTCTGCAT    | Hs_S851A_top       | AGCTTTCTTAAAGACATGCCATCGACAACAGGTCCTG            | Hs_S851A_btm       | CAGCAGCACTGTTTTCGATGGCATCGCTTAAAGAAAGCT       |                                        |
| Hs_E130C_top | GACGAGGTTCCTTATCACTGCAGTACCACCATCTAC      | Hs_E130C_btm | TGATAGTGGTGGGTACTTGCAGTGAAGAGCAGCTTCGT    | Hs_N854K_top       | AAAGACGATAGCATCGACAAGAGCTCTGACCCGCTCC            | Hs_N854K_btm       | GGAGCCGGTCCAGGACCTTTTTCGATGCTATCGTCTTT        |                                        |
| Hs_L158S_top | CGACTTATCTACTTTGGCTTTGGCGGCACATGATTAAGTTC | Hs_L158S_btm | GAACTTAATCAITGTGCTGGCAGTAAAGTAGATAAGTCTG  | Hs_R859S_top       | GAACTTAATCAITGTGCTGGCAGTAAAGTAGATAAGTCTG         | Hs_R859S_btm       | GCCCCTGTTTTTTCGACGCTGGTCCAGGACTTGTGTC         |                                        |
| Hs_K163E_top | GCTCTGCGCCACATGATTGAGTTCAGGGGCCACTTCCCTG  | Hs_K163E_btm | CAGGAAGTGGCCCTGAACTCAATCATGTGCCCCAGAGC    | Hs_S860A_top       | ACAAGGCTGCTGACCCGGCCGACAACAAACGAGGCCAA           | Hs_S860A_btm       | TTTGCCCTGTTTTTTTCGCGCCGGTCCAGGACTTGTCT        |                                        |
| Hs_s179R_top | GACCTTAAACCCGCAACAGGACCGTGTAGACAAATTGTTC  | Hs_s179R_btm | GAACAATTTGCTACGTCCTCTGTGTGGGGTTAAGGTC     | Hs_R864C_top       | ACCOCCTCCGACAAAAAGTGTGGCAAAAGCGACAACGT           | Hs_R864C_btm       | CACGTTGTCTGCTTTTTGCCACAGTTTTTGTCCGAGCGGT      |                                        |
| Hs_Q187K_top | GTATAGACAAATTTGTATCAAGCTATGACAGACCTATAAC  | Hs_Q187K_btm | GTATATAGTCTGTACAAAGTTGTATGACAAATTTGTCTAC  | Hs_S867R_top       | GACAAAAAGGGCCGAAAGGCAACAGTGCAGACGGCAA            | Hs_S867R_btm       | TTCGTTTGGACAGTTTTCGCCCTTTTGCCCTGTTTTGTC       |                                        |
| Hs_N199T_top | ACCAGCAGTGTTCGAGGAACCCCTATTAACGGCAGCGGG   | Hs_N199T_btm | CCCGCTGGCTTAATAGGGGTTCCTCGAAGCAGCTGTGT    | Hs_N869K_top       | ACAGGGGGCAAAGCGCAAGTGCACAGCGGAAAGAGTG            | Hs_N869K_btm       | CACCTCTTCGCTGGCACCTTTGTGCGTTTTGCCCCGTTT       |                                        |
| Hs_K209Q_top | ACCAGCGGGTGTGATGCGCAGGCCATCTTAGCCGCGAG    | Hs_K209Q_btm | CCTGGGCTAAGTATGGCTCGGCATCGCAACCCGCTGGC    | Hs_S872A_top       | AAAGGGACAACGCTGGCCAGGCTAAGAGTGTATTAAGAA          | Hs_S872A_btm       | CTTTTAAACCCTTCTCCGGCTCGCCTGATGTGCTTTTT        |                                        |
| Hs_S219A_top | AGGCCCAAGGCTGTGAGCAAAAGCCGCTTTGAGAACTCTG  | Hs_S219A_btm | CAGGTTCTTCCAAGCCGCTGGCTTTGCTACGCTGGCCGT   | Hs_N979I_top       | TACAAGTGTAGGGAGATCATCAACTACCACCATGCCCAC          | Hs_N979I_btm       | GTGGGACTGGTGTAGTGTGATGATCTCCCTCACCTTGT        |                                        |
| Hs_L258P_top | TTCAAGAGCAACTTCGACCCGCGCAAGAGTCCCAAGCTG   | Hs_L258P_btm | CAGCTTGGCATCTCTCCGCGGTCCAAGTGTCTTGTAA     | Hs_L1004Q_top      | AATTAAGAAGTATCCAAAGCAGAGTCCGAATTTGTCTAC          | Hs_L1004Q_btm      | GTAGACAAATTCGCACTCTCGTTTGATGATCTTCTTAAT       |                                        |
| Hs_D272G_top | TTCAGTAAAGGACACTATGCGCAGCACTGTGACAAATCTG  | Hs_D272G_btm | CAGATTTGTCCAAGTCTGTCGCAATAGTGTCTCTACTCAA  | Hs_I1050F_top      | AACTTTTTCAAGACCCGAGTTCACACTTGCCTTAACGGCAA        | Hs_I1050F_btm      | TTCGCTTGGCAAGTGCAGACTCGCTCTGAAAGAGTT          |                                        |
| Hs_Y286S_top | GCCCAAATCGGCCAGCAGTCCGCTGACCTGTTCTCTGCC   | Hs_Y286S_btm | GGCGAGGAACAGGTCAGCGGACTGTCGCCGATTTGGGC    | Hs_E1056G_top      | ATCACACTTGGCCACGCGGGAATCAGGAAGAGGCCGTCT          | Hs_E1056G_btm      | AAGCGGCTCTTCTCTGATTCGCGCGTGGCAAGTGTGAT        |                                        |
| Hs_R307P_top | CTGCTTAGCCGATATCTTCCAGTGAACACAGAGATCAC    | Hs_R307P_btm | GGTGAATCTCTGTCTACTGGAAGGATATCGCTAAGCAG    | Hs_T1065P_top      | AAGAGGCCGCTTATCGAGCCCAAGGTTGAGACCCGGCAG          | Hs_T1065P_btm      | CTCGCCGGTCTCACGTTGGGCTCGATAAGCCGCGCTCT        |                                        |
| Hs_M321I_top | GGCCCCCTGAGCCGACAGATCATCAAGAGGTACAGCGAG   | Hs_M321I_btm | CTCGCTGTAACCTTGTATGATCTGGCCGCTCAGGGGGGC   | Hs_K1107M_top      | GGCTTACAGGCTTCGTTGTACGCAAGGTAGAGAAGCCG           | Hs_K1107M_btm      | CTTGGGACAGTGGATTCCGATGCAAGCCGCTGTCGTG         |                                        |
| Hs_S368R_top | TACATCGACGGCCGAGCCAGGCAAGAGAGTTCACAAG     | Hs_S368R_btm | CTTGTAGAACCTCCTCTGCTGCCGCTCGCCGCTGATGTA   | Hs_V1146Y_top      | AAGAGCAAGAACTGAAAGCGCTGAAGAGCTGCTCCGGC           | Hs_V1146Y_btm      | CCCTTCTCTACTTCGCGTACACGACGACCGCTGATGCC        |                                        |
| Hs_E387G_top | GAGAAGATGGATGGCACCCGCGGACTGCTGGTGAAGCTG   | Hs_E387G_btm | CAGCTTACCACAGTCCCTCCGCTGCCATCCATCTTCTC    | Hs_S1159A_top      | AAACTGAAGAGCGTGAAGCAGCTGCTCGGCATAACCATC          | Hs_S1159A_btm      | GATGGTATGCCGAGCAGCTGCTTACGCTCTTCAGTTT         |                                        |
| Hs_R424C_top | GAGCTGCACCGCAATGCTGTGCCAGCAGGAGTTCTTCTAC  | Hs_R424C_btm | GTAGAATTCCTCGTGTGCCACAGTATTGGGTGAGAGCTC   | Hs_K1119M_top      | AAAAGAGGACTGATCATCTGCTCCCAAGTACTCTCTCTG          | Hs_K1119M_btm      | CAGGGAGTACCTGGGAGCATGATGATCAGCTCTTGTTA        |                                        |
| Hs_N459K_top | GGCCCTCTTCCGAGCGCAAAAAGCCGATTCGCTTGGATG   | Hs_N459K_btm | CATCCCAAGCGAATCGGCTTTTCCGCTGGCAAGAGGGCC   | Hs_E1207K_top      | CTCTCCCTTCTTGAATTGAAGAACCTTGCATCAAGAGGATG        | Hs_E1207K_btm      | CATCCTTCTTCCGGCTTCTCAACTCAAACAGCCGTTAT        |                                        |
| Hs_W464C_top | GGCAACACGGCATTCGCTTGTATGACCAAGAAAGAGCGAG  | Hs_W464C_btm | CTCGCTCTTCTTGTTCATACAGCGCAATCGGCTGTGCC    | Hs_P1229R_top      | GGCAACGAACTGGCCTGTCGAGCAAGTACGTGAATTAT           | Hs_P1229R_btm      | AAATATCAGTACTTGTCTGCCGACGCCAGTTCTGTGCC        |                                        |
| Hs_R494C_top | GCCAGCTCTTTCATCGAATGTATGACCAATTTGCAAAA    | Hs_R494C_btm | TTTGTGCAAATTGTTCATACATTCGATGAAAGACTGGCC   | Hs_L1282Q_top      | GAAGTACTCTGAAGCAGGGGTGCTTGGGCGAGCACTT            | Hs_L1282Q_btm      | ATCCAGGTTCCGCTGGCCTCAAGCCCTTCTGTCTGA          |                                        |
| Hs_S512P_top | AAGGTGCTCCCAAGCACCCCCTGCTTTACGAGTACTTC    | Hs_S512P_btm | GAAGTACTCTGAAGCAGGGGTGCTTGGGCGAGCACTT     | Hs_F1313S_top      | TTTACCCTTGGTGGTTCCTTGTACAAGTGAAGTACTC            | Hs_F1313S_btm      | GCCCAAGTTTGTCAAGGTTGACAGGTGATGATATTCTC        |                                        |
| Hs_N522K_top | GAGTACTTCAAGCTGTACAAAGGCTTCCAAAGGTGAAA    | Hs_N522K_btm | TTTACCCTTGGTGGTTCCTTGTACAAGTGAAGTACTC     | Hs_D1344N_top      | AGCACTAAGGAGTGTGTAATGCACCTGTATGCACCACAG          | Hs_D1344N_btm      | CTGTGGATCAAGTGGCAATCAGCACCTCTTATGTCT          |                                        |
| Hs_D550N_top | CAGAAGAGCCACTGCTGAACCTGCTGTCAAGACCAAC     | Hs_D550N_btm | ATCCAAGCACTGCATCTTTATGAAGTACTGCTCTCTCAG   | Hs_T1353P_top      | TGTATTCCACGCTTCACTTCCCGGCCCTGTATGAGCCAGG         | Hs_T1353P_btm      | CCTGGCTCATACAGCCGGAATGCACTGTTCAGCTACA         |                                        |
| Hs_K570I_top | CTGAAGGAGACTCTCTCAAATAGATTCGATGCTTTGAT    | Hs_K570I_btm | GTAGGTGCCAGGCTGGCTGCAACTGCTCTCCACGCC      | Hs_N522A_top       | GAGTACTTCAAGGCTGACCGGAGCTCACCAGGTGAAA            | Hs_N522A_btm       | TTTACCTTGGTGAAGTCCGGCTACCGGTGAAGTACTC         |                                        |
| Hs_N588D_top | GGCGTGGAGGACAGGTTGCAGCCGACCTGGGCACTCAC    | Hs_N588D_btm | GTAGGTGCCAGGCTGGCTGCAACTGCTCTCCACGCC      | Hs_N588A_top       | GGCCTGGAGGACAGGTTCCGCGCAGCTGGGCACTCAC            | Hs_N588A_btm       | GTAGGTGCCAGGCTGGCAGGCTGACCTGCTCCAGCC          |                                        |
| Hs_1600M_top | CACGACTTGTGAAAGATAATGAAAGCAAGGATTCTCTTG   | Hs_1600M_btm | CAGGAATTCCTGTCTTCAATATCTTCAACAAGTCGCTG    | Hs_R691A_top       | TCCCTCGAGTATATCTCCGCGCTCCTCATATTACAGGAA          | Hs_R691A_btm       | AATCAGCTGCATGAAGTTCGGTGTGGCAAGCCGTGCGA        |                                        |
| Hs_N612A_top | TTCTTGGATAATGAGGAGCCGAGGATATACTCGAGGAC    | Hs_N612A_btm | GTCCCTCGAGTATATCTCCGCGCTCCTCATATTACAGGAA  | Hs_N692A_top       | GGACAGTCTGCCAGGCCGCTATCTTCTCTCTTTCAG             | Hs_N692A_btm       | GTGAATCAGCTGATGAAAGCTCGGTTGGCAAGCCGCTC        |                                        |
| Hs_T657A_top | CTGAGAGACAGAGATACGCCGCTCGGCGAGACTGTCC     | Hs_T657A_btm | GCCGTTGATGAGTCTCTGCTCAGTCTGCCCAAGCCGT     | Hs_S730A_top       | ATTGCAAACTGGCAGCCGCTGGCATCAAGAAGGCC              | Hs_S730A_btm       | GCCCTCTTGCATGCAGGCGCCTGCCAGGTTTGCAAT          |                                        |
| Hs_S663A_top | ACCGGCTGGGACAGCTGCCAGGAAGCTCATCAACGCC     | Hs_S663A_btm | AATCCGCTTGTAGAGTGTGCCTGGACAGCTGCTGCCACCC  | Hs_R765A_top       | ATGATTTATAGAGTGGCCGGGCAAGCAACGAGCACCCAA          | Hs_R765A_btm       | TTGGTGTCTGTTTCTCCGGGCCATCTTCAATACTAT          |                                        |
| Hs_R664S_top | GGCTGGGCGAGACTGTCAGCAAGCTCATCAACGCGCAT    | Hs_R664S_btm | CTGCTTGTCCCTAAATGGCTTGTATGCTTCTGAGCAG     | Hs_T770A_top       | GGCAGAGCAACAGCAAGCCGGCAAAAGGCCAGGAAGAAC          | Hs_T770A_btm       | GTTCTTCCGCCCCTTTCGCGCCGCTGTTTCTCTCTGCC        |                                        |
| Hs_N668K_top | CTCTCCGGAAGCTCATCAAAGCATTAGGGAACAAGCAG    | Hs_N668K_btm | CTTCCGCTCTGTTGCTTCCGCAATGAGCTTGTATGAGCTT  | Hs_N803A_top       | AAAGAGCACCCCTGGAGGCCAGCCAGCTCAGAACCAG            | Hs_N803A_btm       | CTGTTCTGGAGCTGGCTCGCCTCCAGGGGTCTGCTT          |                                        |
| Hs_R671A_top | AGGCTCATCAACGCAATTCGGGCAAGCAGGCGCAAG      | Hs_R671A_btm | ATCCAGGATGGTCTTGGCCGGCTGCTTGTCCCTAATGCC   | Hs_N854A_top       | AAAGACGATAGCATCGAAGGCTCCTGACCCGCTCC              | Hs_N854A_btm       | GGAGGGGTCAGGACTTCCGCTCGATGCTATCTGCTT          |                                        |
| Hs_S675P_top | GGCATTAGGACAAGCAGCCGGCAAGACCATCCTGGAT     | Hs_S675P_btm | CTTCAAGAAATCCAGGATCATCTCCGCTGCTTGTCT      | Hs_R691A-N692A_top | AAGTCCGAGGCTTCGCCAACCGCCGCTTATCATGAGCTGATTCACAGT | Hs_R691A-N692A_btm | ATCGTGAATCAGCTGCATGAAACCGGCTGGCGAACCCGCTTCGGA |                                        |
| Hs_T678M_top | CACAAGCAGAGCGCAAGATGATCCTGATTTCTCTGAAG    | Hs_T678M_btm | TGCGTGTGGCAAGCCTCGGCCTTCAGGAATCAAGGAT     | Hs_R691N_top       | TCCGAGGCTTCGCCAACCAACTTATGAGCTGATTT              | Hs_R691N_btm       | AATCAGCTGCATGAAGTGTGTGTGGCGAAGCCGTGCGA        |                                        |
| Hs_S685A_top | ATCCTGATTTTCTGAAAGCCGCGCTTCGCCAACGGA      | Hs_S685A_btm | AATCAGCTGCATGAAGTACTGTTGGCGAAGCCGTGCGA    | Hs_R691D_top       | TCCGAGGCTTCGCCAACCAACTTATGAGCTGATTT              | Hs_R691D_btm       | AATCAGCTGCATGAAGTGTGATGTGGCGAAGCCGTGCGA       |                                        |
| Hs_R691S_top | TCCGAGCGCTTCGCCAACAGTACTTTCATGCAGCTGAT    | Hs_R691S_btm | GTGAATCAGCTGCATGAAGTCTCGGTTGGCGAAGCCGTG   | Hs_R691C_top       | TCCGAGGCTTCGCCAACCAACTTATGAGCTGATTT              | Hs_R691C_btm       | AATCAGCTGCATGAAGTGTGATGTGGCGAAGCCGTGCGA       |                                        |
| Hs_N692D_top | GACGGCTTCGCCAACCGGATCTTCTGCAGCTGATTCAC    | Hs_N692D_btm | GTCTCCTTGAAGTCAAAGGCTCATGTCAGCTGATTT      | Hs_R691Q_top       | TCCGAGGCTTCGCCAACCAACTTATGAGCTGATTT              | Hs_R691Q_btm       | AATCAGCTGCATGAAGTGTGATGTGGCGAAGCCGTGCGA       |                                        |
| Hs_S701A_top | CAGCTGTATTCAGATGAGCTTTGACCTTCAAGGAGGAC    | Hs_S701A_btm | CTGATGATCTCCTTGTGACCAAGGCAAGTCTCATCTGAA   | Hs_R691E_top       | TCCGAGGCTTCGCCAACCAACTTATGAGCTGATTT              | Hs_R691E_btm       | AATCAGCTGCATGAAGTGTGATGTGGCGAAGCCGTGCGA       |                                        |
| Hs_T703P_top | ATTCACAGATCAGACTTGCCCTTCAAGGAGGATACCCAG   | Hs_T703P_btm | CAGGAGTTCGCCCTGAAAGCACAAGCTGGGCTTTGGAAT   | Hs_R691G_top       | TCCGAGGCTTCGCCAACCAACTTATGAGCTGATTT              | Hs_R691G_btm       | AATCAGCTGCATGAAGTGTGATGTGGCGAAGCCGTGCGA       |                                        |
| Hs_S714A_top | ATCCAGAGCCGAGCTTGTTCGCAAGGCGACTTCCCTG     | Hs_S714A_btm | TGCAATATGTTGCTGCAGCCTGTCGCCCTGGCCGCTAAC   | Hs_R691H_top       | TCCGAGGCTTCGCCAACCAACTTATGAGCTGATTT              | Hs_R691H_btm       | AATCAGCTGCATGAAGTGTGATGTGGCGAAGCCGTGCGA       |                                        |
| Hs_S719R_top | GTTAGCGCCAGGGCGCAGGCTGCAACGATATTTGCA      | Hs_S719R_btm | CGCAGGGGAGCCTCGCAGGTATGCAATTTCTGTGCGAG    | Hs_R691I_top       | TCCGAGGCTTCGCCAACCAACTTATGAGCTGATTT              | Hs_R691I_btm       | AATCAGCTGCATGAAGTGTGATGTGGCGAAGCCGTGCGA       |                                        |
| Hs_N726Y_top | CTGCACAGAAATATGTCATACCTGCGAGGCTCCCTCGC    | Hs_N726Y_btm | GCCCTTCTTGTATCGAAGGCGCCCTGCAAGTGTGCAAT    | Hs_R691L_top       | TCCGAGGCTTCGCCAACCAACTTATGAGCTGATTT              | Hs_R691L_btm       | AATCAGCTGCATGAAGTGTGATGTGGCGAAGCCGTGCGA       |                                        |
| Hs_S730G_top | ATTGCAAACTTGGCAGGCGCCGCTCGATCAAGAAAGGC    | Hs_S730G_btm | TTCGTTCAACAACCTTAAAGGCTGACATGTGCCCTTCT    | Hs_R691K_top       | TCCGAGGCTTCGCCAACCAACTTATGAGCTGATTT              | Hs_R691K_btm       | AATCAGCTGCATGAAGTGTGATGTGGCGAAGCCGTGCGA       |                                        |
| Hs_T740A_top | AGAAGGGCACTATCGCAGCCGCTTAAAGTGTGGAGCAA    | Hs_T740A_btm | TATGTTTTGGGCTTGGGCTGCCCATGACTTTGACCAA     | Hs_R691M_top       | TCCGAGGCTTCGCCAACCAACTTATGAGCTGATTT              | Hs_R691M_btm       | AATCAGCTGCATGAAGTGTGATGTGGCGAAGCCGTGCGA       |                                        |
| Hs_R753S_top | TTGGTCAAGGTCATGGCGCCCAAGCAGCCCGAAACATA    | Hs_R753S_btm | GGCCATCTCTATAAATTTTTTTCGGGCTTGGCCGCTGCC   | Hs_R691P_top       | TCCGAGGCTTCGCCAACCAACTTATGAGCTGATTT              | Hs_R691P_btm       | AATCAGCTGCATGAAGTGTGATGTGGCGAAGCCGTGCGA       |                                        |
| Hs_N758K_top | GGCAGCGCAAGCCGCAAAAAATGATTATAGAGATGGCC    | Hs_N758K_btm | TTGGGGGCTGCTTCTCGCCAGCCTCTCAACTACTACT     | Hs_R691R_top       | TCCGAGGCTTCGCCAACCAACTTATGAGCTGATTT              | Hs_R691R_btm       | AATCAGCTGCATGAAGTGTGATGTGGCGAAGCCGTGCGA       |                                        |
| Hs_R765G_top | ATAGTATATAGAGTTCGGCGGAGGAGCAACAGACCCCAA   | Hs_R765G_btm | GCCCTTCTTGTATCGAAGGCGCCCTGCAAGTGTGCAAT    | Hs_R691W_top       | TCCGAGGCTTCGCCAACCAACTTATGAGCTGATTT              | Hs_R691W_btm       | AATCAGCTGCATGAAGTGTGATGTGGCGAAGCCGTGCGA       |                                        |
| Hs_N767A_top | ATAGAGATGGCGAGGAGCCGACGACCCAAAGCCGCT      | Hs_N767A_btm | GTTCTTCCGCCCCTTTTGTGTTGCTGTTCTCTCTGGC     | Hs_R691Y_top       | TCCGAGGCTTCGCCAACCAACTTATGAGCTGATTT              | Hs_R691Y_btm       | AATCAGCTGCATGAAGTGTGATGTGGCGAAGCCGTGCGA       |                                        |
| Hs_T770K_top | GCCAGAGAGAACGACCCAAACAAAAGGGCCAGAAGAAC    | Hs_T770K_btm | TTTCAATGCGCTCCGCGCTGCCTCTCGCCCTTTTGGGT    | Hs_R691V_top       | TTCATCGAAGGATGACCGGCTGCAAAAACCTGTGGCT            | Hs_R691V_btm       | AGGCAGGTTTTTTCGCAAGCCGCGCTATCCTGTGATGAT       |                                        |
| Hs_N776A_top | ACCCAAAAGGGCCAGAAGGCCAGCCGGGAGCGCATGAAA   | Hs_N776A_btm | TTCATGCGCTCCGCGCTGCCTCTCGCCCTTTTGGGT      | Hs_N497A_top       | AGATAACCGGCTGGGCGGCTGACCAAGAGCTCACT              | Hs_N497A_btm       | Hs_R661A_top                                  | GCTGCTATCGTGAATCAGCGCATGAAGTTTCGGTGTGC |
| Hs_R661A_top | GATGACTTTCTTGCAGCAGCCGCTCAGGACTGTACT      | Hs_R661A_btm | GCTGCTATCGTGAATCAGCGCATGAAGTTTCGGTGTGC    | Hs_Q695A_top       | GCCAAACCAGAACTTCATGGCGCTGATTCAGCATGACAGC         | Hs_Q695A_btm       | Hs_Q926A_top                                  | GGCCAGTGCCTCGTGATCGCTGGGCTCTCCAGCAGCTG |
| Hs_Q926A_top | GGCCAGTGCCTCGTGATCGCTGGGCTCTCCAGCAGCTG    |              |                                           | Hs_Q926A_btm       | CAGCTGTGTCAGACCCGAGGACATCAGGAGCAGCTGGCC          |                    |                                               |                                        |

# Supplemental Data 2 (Continued)

## Hs-optimized Cas9 SDM oligos

| Oligo Name         | Oligo Sequence                                                              | Oligo Name         | Oligo Sequence                                                                  |
|--------------------|-----------------------------------------------------------------------------|--------------------|---------------------------------------------------------------------------------|
| Ec_R691A_top       | TCGGACGGATTGCTAATGCGAACTTCATGCAGTTGATC                                      | Ec_R691A_btm       | GATCAACTGCATGAAGTTCGCATTAGCAAATCCGTCCGA                                         |
| Ec_N692A_top       | GACGGATTGCTAATCGCGCTTCATGCAGTTGATCCAT                                       | Ec_N692A_btm       | ATGGATCAACTGCATGAACGCGGATTAGCAAATCCGTC                                          |
| Ec_T740A_top       | AAAAAGGGGATCCTCCAGGCGGTGAAAGTTGTAGATGAG                                     | Ec_T740A_btm       | CTCATCTACAACCTTCCACCGCTGGAGGATCCCTTTTT                                          |
| Ec_S845A_top       | GATCATATCGTCCCGCAGGCGTTCCTCAAAGACGATTCT                                     | Ec_S845A_btm       | AGAATCGTCTTTGAGGAACGCGTCCGGGACGATATGATC                                         |
| Ec_S872A_top       | AAGTCGGACAACGTGCCCGCGGAAGAGTTGTGAAAAAG                                      | Ec_S872A_btm       | CTTTTTACAACCTCTCCGCGGGCACGTTGTCCGACTT                                           |
| Ec_R691A-N692A_top | TCGGACGGATTGCTAATGCGCGCTTCATGCAGTTGATCCAT                                   | Ec_R691A-N692A_btm | ATGGATCAACTGCATGAACGCGGATTAGCAAATCCGTCCGA                                       |
| Ec_R691D_top       | TCGGACGGATTGCTAATGATAACTTCATGCAGTTGATC                                      | Ec_R691D_btm       | GATCAACTGCATGAAGTTATCATTAGCAAATCCGTCCGA                                         |
| Ec_R691G_top       | TCGGACGGATTGCTAATGGCAACTTCATGCAGTTGATC                                      | Ec_R691G_btm       | GATCAACTGCATGAAGTTGCCATTAGCAAATCCGTCCGA                                         |
| Ec_R691H_top       | TCGGACGGATTGCTAATCATAACTTCATGCAGTTGATC                                      | Ec_R691H_btm       | GATCAACTGCATGAAGTTATGATTAGCAAATCCGTCCGA                                         |
| Ec_R691Y_top       | TCGGACGGATTGCTAATTATAACTTCATGCAGTTGATC                                      | Ec_R691Y_btm       | GATCAACTGCATGAAGTTATAATTAGCAAATCCGTCCGA                                         |
| Ec_R691W_top       | TCGGACGGATTGCTAATTGGAACCTTCATGCAGTTGATC                                     | Ec_R691W_btm       | GATCAACTGCATGAAGTTCCAATTAGCAAATCCGTCCGA                                         |
| Ec_N497A_top       | TTTATTGAACGTATGACGCGCTTCGATAAAAACTTGCCC                                     | Ec_N497A_btm       | GGGCAAGTTTTTATCGAACGCGTCATACGTTCAATAAA                                          |
| Ec_R661A_top       | CGCTACACAGGATGGGGCGGTTGAGTCGAAACTTATT                                       | Ec_R661A_btm       | AATAAGTTTGCGACTCAACGCGCCCATCTGTGTAGCG                                           |
| Ec_Q695A_top       | GCTAATCGCAACTTCATGGCGTTGATCCATGATGACTCC                                     | Ec_Q695A_btm       | GGAGTCATCATGGATCAACGCGCATGAAGTTGCGATTAGC                                        |
| Ec_Q926A_top       | CAGTTAGTGGAGACTCGTGCATCACCAACATGTCGCG                                       | Ec_Q926A_btm       | CGCGACATGTTGGTGATCGCACGAGTCTCCACTAACTG                                          |
| Ec_K848A_top       | GTCCCGCAGAGCTTCTCGCGGACGATTCTATTGACAAT                                      | Ec_K848A_btm       | ATTGTCAATAGAATCGTCCGCGAGGAAGCTGCGGGAC                                           |
| Ec_K1003A_top      | CTTATCAAGAAATATCCTGCGCTGGAGTCGGAGTTTGTG                                     | Ec_K1003A_btm      | GACAACTCCGACTCCAGCGCAGGATATTTCTTGATAAG                                          |
| Ec_R1060A_top      | AACGGGGAGATTCGAAAGCGCGTTGATCGAAACAAAC                                       | Ec_R1060A_btm      | GTTTGTTCGATCAACGCGCTTTCGCAATCTCCCGTT                                            |
| Ec_hypa_top        | TTCTGAAGTCGGACGGATTGCTAATCGCGCTTCGCCCTTGATCGCGATGACTCCCTGACTTTTAAAGAGGATATT | Ec_hypa_btm        | AATATCCTCTTAAAAGTCAGGGAGTCATCGGCGATCAAGGCGCGAAGGCGCGATTAGCAAATCCGTCCGACTTCAAGAA |

**Supplemental Table 2 (Continued) – Ec-optimized Cas9 SDM oligos**

**gBlock name**

**Sequence (restriction sites in bold)**

**lacYA177C**

ACGCGATAC**GAATTC**CCAGGCTTTACACTTTATGCTTCCGGCTCGTATAATGTGTGGAATCACACAGGAAACAGAATTATGTACTATTTAAAAAACACAAACTTTTGGATGTTT  
GGTTTATTCTTTTTCTTTTACTTTTTTATCATGGGAGCCTACTTCCCGTTTTTCCCGATTTGGCTACATGACATCAACCATATCAGCAAAAGTGATACGGGTATTATTTTTGCC  
GCTATTTCTCTGTTCTCGCTATTATTCCAACCGCTGTTTGGTCTGCTTCTGACAACTCGGGCTGCGCAAATACCTGCTGTGGATTATTACCGGCATGTTAGTGTATGTTTGGC  
CCGTTCTTTATTTTTATCTTCGGGCCACTGTTACAATACAACATTTTAGTAGGATCGATTGTTGGTGGTATTTATCTAGGCTTTTTGTTTTAACGCCGGTGCGCCAGCAGTAGAG  
GCATTTATTGAGAAAGTCAGCCGTCGCAGTAATTTGCAATTTGGTTCGCGCGCGGATGTTTGGCTGTGTTGGCTGGGCGCTGTGTGCCCTCGATTGTCGGCATCATGTTCCACCATC  
AATAATCAGTTTTGTTTTCTGGCTGGGCTCTGGCTGTTGCCATCCTCGCCGTTTTACTCTTTTTTCGCCAAAACGGATGCGCCCTCTTCTGCCACGGTTGCCAATGCGGTAGGT  
GCCAACCATTCCGCATTTAGCCTTAAGCTGGCACTGGAACTGTTTCAGACAGCCAAAACGTGGTTTTTGTCACTGTATGTTATTGGCGTTTTCTGCACCTACGATGTTTTTGAC  
CAACAGTTTGCTAATTTCTTTACTTTCGTTCTTTGCTACCGGTGAACAGGGTACGCGGGTATTTGGCTACGTAACGACAATGGGCGAATTACTTAAACGCCCTCGATTATGTTCTTT  
GCGCCACTGATCATTAATCGCATCGGTGGGAAAAACGCCCTGCTGCTGGCTGGCACTATTATGTCTGTACGTATTATTGGCTCATCGTTCGCCACCTCAGCGCTGGAAGTGGTT  
ATTCTGAAAACGCTGCATATGTTTGAAGTACCGTTCCCTGCTGGTGGGCTGCTTTAAATATATTACCAGCCAGTTTGAAGTGCCTTTTTTTCAGCGACGATTTATCTGGTCTGTTTC  
TGCTTCTTTAAGCAACTGGCGATGATTTTTATGTCTGTACTGGCGGGCAATATGTATGAAAGCATCGGTTTTCCAGGGCGCTTATCTGGTGTGGGTCTGGTGGCGCTGGGCTTC  
ACCTTAATTTCCGTGTTACGCTTAGCGGCCCGGCCGCTTTCCCTGCTGCGTCAGGTGAATGAAGTCGCTTAAGCAATCAATGTCGGATGCGGACCGGGAGCGCTGTGA  
ATACAGTGCTCCCTTTTTTTTATT**GAGCTC**ACTTCACAC

**araC-PBAD-ccdB**

CGTTACCA**AGGTACC**TTATGACAACCTTGACGGCTACATCAATCACTTTTTCTTACAAACCGGCACGGAACCTCGCTCGGGCTGGCCCCGGTGCATTTTTTTAAATACCCGCGAGAA  
ATAGAGTTGATCGTCAAAACCAACATTGCGACCGACGGTGGCGATAGGCATCCGGGTGGTGTCTAAAAGCAGCTTCGCCCTGGCTGATACGTTGGTCCTCGCGCCAGCTTAAGAC  
GCTAATCCCTAACTGCTGGCGGAAAAGATGTGACAGACGCGACGGCGACAAGCAAAATGCTGTGCGACGCTGGCGATATCAAAATTGCTGTCTGCCAGGTGATCGCTGATGTA  
CTGACAAGCCTCGCGTACCCGATTATCCATCGGTGGATGGAGCGACTCGTTAATCGCTTCCATGCGCCGAGTAACAATTGCTCAAGCAGATTTATCGCCAGCAGCTCCGAATA  
GCGCCCTTCCCTTGCCCGGCGTTAATGATTTGCCCAAACAGGTGCTGAAATGCGGCTGGTGCCTTCATCCGGGCGAAAGAACCCCGTATTGGCAAATATTGACGGCCAGTT  
AAGCCATTCATGCCAGTAGGCGCGCGGACGAAAAGTAAACCCACTGGTGATACCATTCGCGAGCCTCCGGATGACGACCGTAGTGATGAATCTCTCCTGGCGGGAACAGCAAAAT  
ATCACCCGGTCGGCAAAACAAATTTCTGTCCTGATTTTTACCACCCCTGACCGCAATGGTGAGATTGAGAAATAAACCTTTCATTCACAGCGGTCCGTCGATAAAAAATC  
GAGATAACCGTTGGCTCAATCGGCGTTAAACCCGCCACCAGATGGGCATTAACGAGTATCCCGGCAGCAGGGGATCATTTTTGCGCTTCAGCCATACTTTTCATACTCCCGCC  
ATTGAGAGAAGAAACCAATTGTCCATATTGCATCAGACATTGCCGCTACTGCGTCTTTTACTGGCTCTTCTCGTAACCAACCGGTAACCCCGCTTATTTAAAGCATTCGTGA  
ACAAAGCGGGACCAAAGCCATGACAAAAACGCGTAACAAAAGTGTCTATAATCACGGCAGAAAAGTCCACATTGATTATTTGCACGGCGTCACACTTTGCTATGCCATAGCATT  
TTTATCCATAAGATTAGCGGATCCTACCTGACGCTTTTTATCGCAACTCTCTACTGTTTCTCCATACCCGTTTTTTTTGGGCTAGCGATTGAAAACGGTGCAGTTCAAGGTTTAC  
ACCTATAAAAGAGAGACCGCTATCGCTGTTTGTGGATGTACAGAGTGATATTATTGACACGCCCCGGGCGACGGATGGTGTATCCCCCTGGCCAGTGCACGCTCTGCTGTGAT  
AAAGTCTCCCGTGAACCTTACCCGGTGGTGCATATCGGGGATGAAAGCTGGCGCATGATGACCACCCAGATGGTCAAGTGTGCCGGTCTCCGTCATCGGAGAAGAAGTGGCTGAT  
CTCAGCCACCGCGAAAAATGACATCAAAAACGCCATTAATCTGATGTTCTGGGGAATATAAATCTAGAGGGCACGGGCAGCTTGCCGGTGGAAAGCTTGCTGTTTTGGCGGATGAG  
AGAAGATTTTCAGCCTGATACAGATTAATCAGAACGCAGAAGCGGTCTGATAAAAACAGAAATTTGCCTGGCGGCAGTAGCGCGGTGGTCCACCCTGACCCCATGCCGAACCTCAG  
AAGTGAACCGCGTAGCGCCGATGGTAGTGTGGGGTCTCCCCATGCGAGAGTAGGGAACTGCCAGGCATCAAAATAAAACGAAAGGCTCAGTCGAAAGACTGGGCCCTTTCGTTTT  
ATCTGTTGTTTGTGCGGTGAACGCTCTCCTGAGTAGGACAAATCCGCCGGGAGCGGATTTGAACGTTGCGAAGCAACGGCCCGGAGGGTGGCGGGCAGGACGCCCGCCATAAACT  
GCCAGGCATCAAAATTAAGCAGAAGGCCATCCTGACGGATGGCCTTTT**CTGCAGT**GCGTTTTCT

gBlock® name

Sequence (restriction sites in bold)

V3off1

CAGGACCAT**GAGCTC**AGTGTAGTGTGTGTGTGGGGTAATACGACTCACTATAGGTGAGTGTGTGCGTGTTTTAGAGCTAGAAATAGCAAGTTAAAATAAGGCTAGTCCGTTATCAA  
CTTGAAAAAGTGGCACCCGAGTCGGTGCTCCGCTGAGCAATAACTTAGCATAACCCCTTGGGGCCTCTAAACGGGTCTTGAGGGGTTTTTTGAA**CTGCAGC**AGCAGTAC

EXoff1

CAGGACCAT**GAGCTC**GAGTTAGAGCAGAAGAAGAAAGGTAATACGACTCACTATAGGAGTCCGAGCAGAAGAAGTTTTAGAGCTAGAAATAGCAAGTTAAAATAAGGCTAGTCCGTTATC  
AACTTGAAAAAGTGGCACCCGAGTCGGTGCTCCGCTGAGCAATAACTTAGCATAACCCCTTGGGGCCTCTAAACGGGTCTTGAGGGGTTTTTTGAA**CTGCAGC**AGCAGTAC

NLS-Cas9-NLS-NLS

AGCCAGTTA**CCATGGG**CAGCAGCGCCCCAAAGAAGAAGCGGAAGGTCGGTATCCACGGAGTCCCAGCAGCCATGGACAAAAAGTACTCTATTGGCCTGGATATCGGGACCAACAGCGTCGGGT  
GGGCTGTTATCACCGACGAGTATAAAGTACCTTCGAAAAAGTTCAAAGTGTGGGCAACACCGATCGCCATTCAATCAAAAAGAAGTGGATTGGTGCCTGTTGTTTACTCCGGGGAAACCG  
CCGAGGCGACTCGCCTTAAACGTACAGCACGTGCGCGGTACACTCGGCGTAAGAATCGCATTGCTATTTGCAGGAAATCTTTAGCAACGAGATGGCAAAAGTTCGATGACTCGTTTTTCCACC  
GCCTCGAGGAAAGCTTCTGGTGGAGGAAGACAAAAAGCATGAGCGTCAACCGATCTTCGGCAACATTGTCGATGAAGTAGCGTATCATGAAAAATACCCAACCATTTACCCTTACGCAAAA  
AGCTGGTGGACAGCACTGACAAAGCTGATTTGCGCCTTATCTATTTAGCCCTGGCACATATGATTAAGTTTTCGTGGTCACTTCCTGATCGAAGGAGACTTAAATCCCACAAACAGTGTGTTG  
ATAAATTGTTTATTCAGCTTGTCCAAACTTACAATCAACTGTTTCGAGGAAAACCCGATCAATGCCTCCGGTGTGGATGCAAAAGCCATTTTAAAGTGCACGCCTTAGCAAGTCCCGTCGCTTAG  
AAAACCTTATCGCGCAGCTGCCCCGGCGAGAAAAAGAATGGTTTTGTTTGGGAACCTTATTGCCTTGAGCTTAGCCCTCACCCCGAATTTCAAAAGTAATTTTCGATCTTGCAGAAGACGCCAAAT  
TACAACGTGTCGAAGGATACTTATGATGACGATCTCGATAATCTGTTAGCGCAGATTGGTGCACCAATACGCCGATCTTTTTCTGGCGGCTAAAAATCTGAGCGACGCCATCTTGCTTTCGGATA  
TTCTCCGCGTTAACACCGAAATCACGAAAGCGCCTCTTAGTGCCAGCATGATTAACGTTATGATGAACACCACCAGGACCTGACCTTACTCAAAGCGTTGGTTCGCCAGCAACTGCCAGAGA  
AGTACAAAGAAATCTTCTTTGATCAGTCAAAGAATGGTTATGCCGGCTATATTGACGGGGGTGCAAGCCAAGAGGAATCTACAAATTTATCAAGCCTATTCTGGAGAAAATGGATGGCACCG  
AAGAGTTATTGGTGAAGCTTAACCGTGAAGACCTCCTGCGGAAACAGCGCACATTCGATAATGGTTCGATCCCACACCAAATCCATTTGGGGGAGTTACACGCTATTTTGCCTCGCCAGGAAG  
ACTTTTACCCTTCTCTGAAGGATAACCGGGGAGAAAATTGAGAAGATCCTTACCCTTTCGATTTCCGTTATTACGTAGGCCCTTAGCACGGGGTAATAGCCGTTTCGCGTGGATGACACGGAAGT  
CGGAAGAGACGATCACCCCGTGGAACTTCGAAGAGGTAGTCGACAAGGGCGCATCAGCGCAGTCTTTTATTGAACGTATGACGAATTTTCGATAAAAACTTGCCCAATGAGAAGGTGCTTCCGA  
AACATTCCTTGTATATGAATATTTTACAGTTTACAACGAGCTGACCAAGGTTAAATACGTGACGGAAGGAATGCGCAAGCCCGCTTTTCTTAGCGGTGAGCAAAAAAAGGCGATCGTCGACC  
TGTTATTCAAACGAATCGTAAGGTGACTGTAAAGCAACTCAAAGAAGATTACTTCAAAGAGATTGAGTGTTCGACAGCGTCAAAATCTCTGGGGTAGAGGATCGGTTTAAACGAAGTTTAG  
GTACCTACCATGACCTGCTTAAAATCATTAAAGGATAAAGACTTCTTAGATAATGAAGAGAACGAAGATATTCTCGAGGACATCGTCTTGACGTTAACCTTATTTGAGGATCGTGAAATGATTG  
AGGAACGCCTCAAACCTTATGCCACCTGTTTCGACGATAAGGTGATGAAGCAGCTGAAACGTGCGCGCTACACAGGATGGGGCCGCTTGAGTCGCAAACTTATTAACGGAATCCGTGACAAGC  
AATCCGGCAAACGATTCTGGATTTCTTGAAGTCGGACGGATTTGCTAATCGCAACTTCATGCAGTTGATCCATGATGACTCCCTGACTTTTAAAGAGGATATTCAAAGGCGCAGGTTAGTG  
GTCAAGGCGACAGCTTACACGAACACATCGCAAATTTGGCTGGTTCGCCGGCCATTA AAAAGGGGATCCTCCAGACCGTGAAAGTTGTAGATGAGCTTGTTAAGGTTCATGGGTGTCATAAGC  
CCGAAAACATCGTGATTGAAATGGCGCGGGAGAATCAAACGACCCAGAAAGGACAAAAGAATAGCCGTGAACGGATGAAGCGGATCGAGGAAGGCATTAAGAGCTGGGGTCTCAAATCTTGA  
AGGAACACCCTGTGGAGAACACTCAGCTCCAAAATGAAAACTTTACCTGTACTATTTGCAGAACGGACCGGATATGTACGTGGACCAAGAGTTGGATATTAATCGGCTGAGTGACTACGACG  
TTGATCATATCGTCCCGCAGAGCTTCTCAAAGACGATTCTATTGACAATAAGGTACTGACGCGCTCTGATAAAAACCGTGGTAAGTCGGACAACGTGCCCTCCGAAGAGGTTGTGAAAAAGA  
TGAAAAATTATTGGCGCCAGCTTTTAAACGCGAAGCTGATCACACAACGTAAATTCGATAATTTGACCAAGGCTGAACGGGGTGGCCTGAGCGAGTTAGATAAAGCAGGATTTATTAACGCC  
AGTTAGTGGAGACTCGTCAAATCACCAACATGTGCGCAGATTTTGGACAGCCGGATGAACACCAAGTACGATGAAAATGACAACTGATCCGTGAGGTGAAAGTCATTACTCTGAAGTCCA  
AATTAGTTAGTGATTTCCGGAAGGACTTTCAATTCTACAAAGTCCGTGAAATTAATAACTATCATCACGCACATGACGCGTACCTGAATGCAGTGGTTGGGACCGCCCTTATCAAGAAATATC  
CTAAGCTGGAGTCGGAGTTTGTCTATGGCGACTATAAGGTATACGATGTTTCGCAAAATGATTGCGAAATCTGAGCAGGAGATCGGTAAGGCAACCGCAAAATATTTCTTTTACTCAAACATTA  
TGAATTTCTTTAAGACAGAAATCACTCTGGCCAACGGGGAGATTTCGCAACGTCCGTTGATCGAAACAAACGGCGAGACTGGCGAAATTTGTTTGGGACAAAGGGCGTGATTTTCGCGACGGTGC  
GCAAGGTACTGAGCATGCCTCAAGTCAATATTGTTAAGAAAACCGAAGTGCAGACGGGCGGGTTTTTCCAAGGAAAGCATCTTACCCAAACGTAATTCAGATAAACTTATTGCACGCAAAAAGG  
ACTGGGATCCGAAAAAGTATGGAGGCTTCGACAGTCCAACCGTAGCCTACTCTGTTCTCGTTGTAGCGAAAGTAGAAAAGGGTAAATCCAAGAACTGAAATCTGTCAAGGAGTTGCTTGGAA  
TCACCATTATGGAGCGTAGCTCCTTCGAGAAGAACCCGATTGACTTCTGGAAGCCAAAGGATATAAAGAGGTCAAGAAAGATCTTATCATTAAAGCTGCCTAAGTATTCACTCTTCGAGCTGG  
AAAATGGTTCGTAACGCATGCTCGCTTCTGCCGGCGAGTTGCAGAAGGGCAATGAATTAGCACTTCCATCAAAGTACGTTAACTTCTGTATTTGGCCAGCCATTACGAGAACTGAAGGGGT  
CTCCAGAGGACAACGAACAGAAACAATTTTGTAGAGCAGCACAAGCATTATCTTGATGAAATCATTGAGCAAATTTCCGAATTCAGTAAACGCGTAATCCTGGCCGATGCAACCTCGACA  
AGGTGCTGAGCGCTTACAATAAGCATCGCGACAAACCTATCCGTGAGCAGGCTGAAAATATCATTACCTGTTACATTAACGAACCTGGGCGCTCCGGCCGCTTTTAAATATTTTCGACACGA  
CAATCGACCGTAAGCGCTATACCAGTACGAAAGAAGTGTGGATGCGACCCTTATTCACCAGTCAATTACAGGATTATATGAGACCCGTATCGACCTTAGCCAATTAGGTGGGGATGCGGCC  
CGAAGAAAAACGCAAAGTGGATCCGAAGAAAAACGCAAAGT**GCGGCCGC**CAGGACCTA

Supplemental Table 3  
(continued)

| <b>crRNA name</b> | <b>20 nt targeting crRNA sequence (DNA sequence listed absent proprietary universal sequence and chemical modifications)</b> |
|-------------------|------------------------------------------------------------------------------------------------------------------------------|
| EMX1              | GAGTCCGAGCAGAAGAAGAA                                                                                                         |
| HEKSite4          | GGCACTGCGGCTGGAGGTGG                                                                                                         |
| VEGFA3            | GGTGAGTGAGTGTGTGCGTG                                                                                                         |
| HPRT-S-38094      | TCCATTTTCATAGTCTTTCCT                                                                                                        |
| HPRT-S-38231      | TTTTGTAAATTAACAGCTTGC                                                                                                        |
| HPRT-S-38371      | CTTAGAGAATATTTGTAGAG                                                                                                         |
| HPRT-S-38509      | TTGACTATAATGAATACTTC                                                                                                         |
| HPRT-S-38574      | CAAAACACGCATAAAAATTT                                                                                                         |
| HPRT-AS-38087     | AATTATGGGGATTACTAGGA                                                                                                         |
| HPRT-AS-38133     | GGTCACTTTTTAACACACCCA                                                                                                        |
| HPRT-AS-38285     | CTTATATCCAACACTTCGTG                                                                                                         |
| HPRT-AS-38287     | GGCTTATATCCAACACTTCG                                                                                                         |
| HPRT-AS-38358     | ATTTACATAAAAACCTTTTT                                                                                                         |
| HPRT-AS-38636     | TCAAATTATGAGGTGCTGGA                                                                                                         |
| HPRT-AS-38673     | TACAGCTTTATGTGACTAAT                                                                                                         |
| CTLA4-S-542       | AGGACTGAGGGCCATGGACA                                                                                                         |
| CTLA4-S-543       | GGACTGAGGGCCATGGACAC                                                                                                         |
| PDCD1-S-383       | CGGAGAGCTTCGTGCTAAAC                                                                                                         |
| PDCD1-AS-429      | CTGGCTGCGGTCCTCGGGGA                                                                                                         |
| AR-S-1893         | GTTGGAGCATCTGAGTCCAG                                                                                                         |
| HBB               | CTTGCCCCACAGGGCAGTAA                                                                                                         |
| HiFi-Cell-Line    | CAGCTGCATGAAGTTTCGGT                                                                                                         |

**Supplemental Table 4 – crRNA protospacer sequences**

# Multiplex NGS Off-target Primers

## crRNA – AR

*Note - Oligo sequences are absent proprietary 5' tails and chemical modifications*

*“iGS” – Amplicons for GUIDE-seq identified targets*

*“picks” – Amplicons for CRISPOR predicted targets*

## Forward

## Reverse

|                   |                                 |                   |                                  |
|-------------------|---------------------------------|-------------------|----------------------------------|
| A_iGS_10.1410_FO  | AAGACAGGGAACCCAGCGCAGAA         | A_iGS_10.1410_EV  | GCAAGGGAGATTGAGCCACGAAAG         |
| A_iGS_11.4097_FO  | GTGGGTATTTAGGGAACCTGTGAGCAT     | A_iGS_11.4097_EV  | AGCAAATTTGAAGCAAGTCTGGCCCTCG     |
| A_iGS_12.80_FO    | GTGAGAAGTCACACCTAATCACCCCTCG    | A_iGS_12.80_EV    | CTTATAGTAAGTTAGGTGTGAGGGGAAGCT   |
| A_iGS_13.2373_FO  | CTATGGAGTCCCTAAAACCTCAGATTTTC   | A_iGS_13.2373_EV  | GTCTAATACACTCACAAGTCCAGCCAAAC    |
| A_iGS_14.2155_FO  | CACATCTGACCAAGTCTGAAACAAGT      | A_iGS_14.2155_EV  | GTTTTCTGGAAACTCCGTTTTCTTAAC      |
| A_iGS_15.349_FO   | TAAAAGTAGTGATCCACCCACGGTAG      | A_iGS_15.349_EV   | TTGTGTAGAAAGACAGACTGGCAGGGC      |
| A_iGS_16.939_FO   | TGTGGATGAAGGACAGCAGAGAAT        | A_iGS_16.939_EV   | GTGGGCTAAGCTGGGTAATATCT          |
| A_iGS_17.1071_FO  | ACTGAAGTACAGGTGACCTCAGAGC       | A_iGS_17.1071_EV  | ACACTCTCCACCTAGCCCTACA           |
| A_iGS_18.460_FO   | CACTAGTTTCAGCAGCAAGACATAGA      | A_iGS_18.460_EV   | TCSTTAGGATGGGTTTCGTGACAGTTT      |
| A_iGS_19.3546_FO  | CGTTACTGTGCCCTCCAAGCATCCG       | A_iGS_19.3546_EV  | GCAACAAGAACCCTCTCTGTCTCA         |
| A_iGS_1.1013_FO   | ACCATTTCTGACAACGCCAAGGAGTA      | A_iGS_1.1013_EV   | CAGAGAACCCTTTCGATTTCGGCCAATC     |
| A_iGS_20.1461_FO  | GCATTTGTGTTTTCTGCCGAGAGC        | A_iGS_20.1461_EV  | CATTTTCAGCAGGGCATCCAGCAG         |
| A_iGS_21.2084_FO  | GGCAATAGTTCCTGCTGTTGGGGAGT      | A_iGS_21.2084_EV  | TGTGAGAAGTGATGACAGCTGGCT         |
| A_iGS_22.1004_FO  | AAGATGACCTGTATGCTTGGCACTGC      | A_iGS_22.1004_EV  | ATCTTTCCCTCCTGAGCTCAGTCAGC       |
| A_iGS_23.536_FO   | GTGGTCTTGAAAATGAGTCACACACT      | A_iGS_23.536_EV   | AGCAGGGTCTTACTAAGTTGCCAAC        |
| A_iGS_24.745_FO   | TCACCTCCTACACGATATCACTGGTC      | A_iGS_24.745_EV   | ATACTTTGGGTTCTACCCCATCGGCTC      |
| A_iGS_25.1019_FO  | GCCTAGACAACATGGTCAAACCCCTTG     | A_iGS_25.1019_EV  | CTTTTGCCAGGGTCAAATACAGTGC        |
| A_iGS_26.321_FO   | TACACACACTTCATACACCACACCTT      | A_iGS_26.321_EV   | ATTGTGGGAGAAATGAGAGAAAGCTTCT     |
| A_iGS_27.4760_FO  | CTTAGTGTGATGGTCAAAGACCCTCTA     | A_iGS_27.4760_EV  | GAAACAAGGGAACATTTAGGCAGGATGT     |
| A_iGS_28.731_FO   | CTCACTGTGGAGTCTAACCAGCCTAAC     | A_iGS_28.731_EV   | ATCTAGTAATCCCTGGCAGTCCGCATC      |
| A_iGS_29.890_FO   | ATCTCTCCTGATGTGCTGCTGGAT        | A_iGS_29.890_EV   | CAATCCAGAGTCCATCTCCAACA          |
| A_iGS_2.2642_FO   | GGTTTTCTCTTTGCAATTGTTATGTGGTCTG | A_iGS_2.2642_EV   | GAACATTCAGAAACTGCTCTGACTACGTCTC  |
| A_iGS_30.352_FO   | GGCCCTCCATTTCTCATCTGTAT         | A_iGS_30.352_EV   | GACTCCTGGTACCAGTACTGAGATC        |
| A_iGS_32.120_FO   | ATCTCGCACCCCTCCCGCTTGC          | A_iGS_32.120_EV   | TGAGCGCTGTTGGTGCATGGC            |
| A_iGS_33.1128_FO  | CCAGCCAGCATTACTCTTAATTTCCACTAG  | A_iGS_33.1128_EV  | GTACCTATCCAATAAGACTGGTTTGAATAAGA |
| A_iGS_34.739_FO   | ATGGCAAATCAGATTCAGGATTGGAGAT    | A_iGS_34.739_EV   | GTCTTCAGTGTTCAGAACAGAATACTTGA    |
| A_iGS_35.908_FO   | CTCCTAGGACTTCATAGTTGCTGGTAAT    | A_iGS_35.908_EV   | TTCTGGCTCCATCTACCTTAGGGACTC      |
| A_iGS_36.1232_FO  | TGTTACGAGCTTTGCTGAGGTCACCT      | A_iGS_36.1232_EV  | ATGGGCTTTTGTACCATCCAGGAAGT       |
| A_iGS_37.1106_FO  | TGAAACAGCCTTTTCCAGACCTG         | A_iGS_37.1106_EV  | AAGCCTCTCCAACCATCTGCTC           |
| A_iGS_38.828_FO   | CAGTGGCTTATGCTGTAATACTAGCT      | A_iGS_38.828_EV   | GACAAGGTTTCGTCATGTTACCCAGAG      |
| A_iGS_39.400_FO   | GTGAATTTCTGAGGGACACATTCAGCGC    | A_iGS_39.400_EV   | CCACTCACCTTCTCATTTGATTTGAGCAT    |
| A_iGS_3.3423_FO   | GGTATGTGTCACCTCCTCTCCATGT       | A_iGS_3.3423_EV   | CACAAGCCAATAGGTGCTGTGACGT        |
| A_iGS_40.472_FO   | TCAAAACAACAAGTAACCCAGCTGTA      | A_iGS_40.472_EV   | CCACGCCTTGCTAATTTAAAAATGTTTTA    |
| A_iGS_41.1521_FO  | CAATGTATATTGGGAATTTCTCCCCCTCTT  | A_iGS_41.1521_EV  | CCTATGATTTTAGGTTGTGTCTCTTTGAGGCG |
| A_iGS_42.3774_FO  | TGTTATAACCTGAGGACACCAGCAAGT     | A_iGS_42.3774_EV  | TCGTTAAACACCAAGAGTCAACCAAGA      |
| A_iGS_43.5085_FO  | CCTTTTCTCATACTACTCCAGCTCTGACA   | A_iGS_43.5085_EV  | ATGCGTAGACTCAACTGATGTGTCAGTGA    |
| A_iGS_44.2328_FO  | CTAAAAGGAGTTGTCACTGGGTATGT      | A_iGS_44.2328_EV  | AGTAGCTGGGATTTAGGAGACAGGAA       |
| A_iGS_45.347_FO   | GAGTCTGACACCTTTTAAGATCTGACAGT   | A_iGS_45.347_EV   | GAAAACCTCAAAGAAATGCCCAATCATTGT   |
| A_iGS_46.31_FO    | GTGTGAACCTCTCATGGCGTCCAG        | A_iGS_46.31_EV    | GCTCGACTGTTTCCCAGACCTCAC         |
| A_iGS_4.415_FO    | CCCTCCATCTTCTAACTGTAACCTGGC     | A_iGS_4.415_EV    | AGTAAGCCTTACCATGAGCCAGCAA        |
| A_iGS_5.889_FO    | AACTGAGTACTCTCTGCGCTCTCACG      | A_iGS_5.889_EV    | GTAGTTACAGCTACTTGGGAGCCCAAGC     |
| A_iGS_6.1573_FO   | CCCTTCAGCTGCAGAATAAACAGGAG      | A_iGS_6.1573_EV   | AGCCCATAAAGTCTTTGAGAAAGCCCT      |
| A_iGS_7.3052_FO   | ACTTCAGGCAAGACAAGAAGATACAGGGT   | A_iGS_7.3052_EV   | CACTCCACCTGATTCAAAACATGACGCTG    |
| A_iGS_8.435_FO    | GCTAATGGGTCAGGGTTTCTATCA        | A_iGS_8.435_EV    | TTACAGGCACCCACGATCACTCG          |
| A_iGS_9.602_FO    | GCTCAGCAAATCTCATACTCCTACTCAGT   | A_iGS_9.602_EV    | CATGGAACTGAAGAAAGGTAGAACACAGG    |
| A_picks_10.331_FO | CAACTTCTTGCTTGTCCATGCAGACA      | A_picks_10.331_EV | GATTGCAGCTCTCAGTAAAAAGGGTTA      |
| A_picks_1.106_FO  | CGCAACCACTTTCCAAACATCCG         | A_picks_1.106_EV  | CCAGGCTAGAGAGGGATGACCTC          |
| A_picks_2.59_FO   | CACATGATGGATCTGTGCAATAGTCATT    | A_picks_2.59_EV   | TCATGATAAATACCTGGCAGTGGACAGT     |
| A_picks_3.868_FO  | GGTAGAAAAGGGATCTAGTCTGTGTCG     | A_picks_3.868_EV  | CGATCCAGTATTGAGCACCTACTGTCTA     |
| A_picks_4.1283_FO | GGGAATTCACCTCCTTTGTCTTGTG       | A_picks_4.1283_EV | TCCCAATGGCAAGTGATATTTCCACAA      |
| A_picks_5.560_FO  | CTGAAAGAAGCAGTACACTTGGCATGAA    | A_picks_5.560_EV  | TCAGGGCCTAGAGTTTTATGAGCATT       |
| A_picks_6.155_FO  | AGCAAACATAACATACACAGAACAAGA     | A_picks_6.155_EV  | GAAATGTTCCCTCTTTAGTATTTCTCCAC    |
| A_picks_7.2454_FO | AGGCTGAGAAGTTCTACAAGATGCTCTCA   | A_picks_7.2454_EV | TCACTCTTTGAGGAGTTTGTGCGCACTG     |
| A_picks_8.936_FO  | CCAAGCTGACTAAGACACTCTGATCCA     | A_picks_8.936_EV  | CTTCTTTGTCTGAGACAGCTGGCCTC       |
| A_picks_9.1770_FO | CAACTTTTAAAACCCATCATGCATTCTCAC  | A_picks_9.1770_EV | GTGAAGCTTGTGAAAACCTGATGTAGCATAA  |



Multiplex NGS Off-target Primers  
crRNA – *HPRT 38087*

*Note - Oligo sequences are absent proprietary 5' tails and chemical modifications*

*“iGS” – Amplicons for GUIDE-seq identified targets*

*“picks” – Amplicons for CRISPOR predicted targets*

Forward

Reverse

|                          |                                   |                          |                                    |
|--------------------------|-----------------------------------|--------------------------|------------------------------------|
| HPT38087_iGS_10.2441_FO  | CTCACTTACACGTAGGAGCTAAACACTAC     | HPT38087_iGS_10.2441_EV  | GGTAGTGAACACAGTACCTACACAATGC       |
| HPT38087_iGS_11.728_FO   | GAACAGTGTGACAAGTGTCCCAATGC        | HPT38087_iGS_11.728_EV   | CAAATGTTGAACCAATCCGTGCCATCA        |
| HPT38087_iGS_12.2204_FO  | CATTCAGGAAACAGCTGTAGTATCTGCAT     | HPT38087_iGS_12.2204_EV  | CCTCTTGATGATCTTGTAACTCGAGAGT       |
| HPT38087_iGS_13.110_FO   | ATTATTTCAAAGAATGCTGCCAGAGACC      | HPT38087_iGS_13.110_EV   | AAAAGTGTAGACTGTCAATAGTAAGTGA       |
| HPT38087_iGS_14.1291_FO  | ATCACAAGTGTCTATGAAGGAAATGAAG      | HPT38087_iGS_14.1291_EV  | CTATGAAGCACAGGGAGTCAAGTCG          |
| HPT38087_iGS_15.2869_FO  | CTGAGAGTTTCTGCTGGTCACTTG          | HPT38087_iGS_15.2869_EV  | TCACCTGGAAAGAAGCAACCCTC            |
| HPT38087_iGS_16.3205_FO  | CCACTGTATCCAGCACTTTGTCAAATC       | HPT38087_iGS_16.3205_EV  | TTCCATACCAGAGAACAGCAAGCATT         |
| HPT38087_iGS_17.647_FO   | ACTCTGAATAAAACAGACATGGTCCCTGG     | HPT38087_iGS_17.647_EV   | TTCATTGAGGTTTCTGGTATGATAAACAA      |
| HPT38087_iGS_18.206_FO   | TTTACCCAATACCTGTACCCACATTGA       | HPT38087_iGS_18.206_EV   | CACAGCCAAACCATATCATACCCTCG         |
| HPT38087_iGS_19.1052_FO  | CCTTCACACAAACGCCATCCAAAC          | HPT38087_iGS_19.1052_EV  | AGAGTTTTCAGGGCAAGGGCCAAC           |
| HPT38087_iGS_1.2824_FO   | CAGGTCTCAGAAGTGTCTTACAGTA         | HPT38087_iGS_1.2824_EV   | CATTTTCATCCGTGCTGAGTGTACCT         |
| HPT38087_iGS_20.1010_FO  | AACAATTCGACACACACTTCCCAGGC        | HPT38087_iGS_20.1010_EV  | AATCTGGTCTCTGGTCTCTTCTGGCA         |
| HPT38087_iGS_21.4345_FO  | TCCCAGAATAATCGTAAAGCAAATGACCAT    | HPT38087_iGS_21.4345_EV  | CAAGTTTCTCCTCACCTAAGAAGTGGAGATT    |
| HPT38087_iGS_22.1702_FO  | CCCTCAGACTCAAGCAAGCATGG           | HPT38087_iGS_22.1702_EV  | AGCTGCTGGAGCATTCCTGGGA             |
| HPT38087_iGS_23.1695_FO  | AGGATAGAGCTTCGACTCATATTTTCCACGA   | HPT38087_iGS_23.1695_EV  | GATGTTTCTTCTTCCCACCAAACTCAGG       |
| HPT38087_iGS_24.2707_FO  | GAACTCCTGGGCTCATGCAGTCG           | HPT38087_iGS_24.2707_EV  | CCCTCCTCCGAGTGTGTACAACCT           |
| HPT38087_iGS_25.1554_FO  | CAGAGTACTCACCCACCTCCTAAA          | HPT38087_iGS_25.1554_EV  | TGAACAGACCCTCACCAAGACAAG           |
| HPT38087_iGS_2.2713_FO   | GCAATATGCCCTCTGATAAGGAATAGAGATGAA | HPT38087_iGS_2.2713_EV   | GGGATTTTGTCACTAGAAAAGTTTAGAAAGTACA |
| HPT38087_iGS_3.998_FO    | TGCTGTTTCCCTAGGATTCAGGACCAC       | HPT38087_iGS_3.998_EV    | CAAATGGACGTTGTAGAGGCAGACT          |
| HPT38087_iGS_4.2924_FO   | CTCAACAAGATATTTCCCTCTACTTCTAGCT   | HPT38087_iGS_4.2924_EV   | GATTAATGTCTCTGCTTTTCTGAGTGGATTG    |
| HPT38087_iGS_5.672_FO    | CCACACCTGAACAGATTCTTTCACAAC       | HPT38087_iGS_5.672_EV    | TACACAAGGAGAACCACAGACTGACG         |
| HPT38087_iGS_6.215_FO    | AGGCCATTGTTCTATTTGGGACAGCTG       | HPT38087_iGS_6.215_EV    | GGCTCCCGAAAATCATCAAGTCAAT          |
| HPT38087_iGS_7.2963_FO   | GAATTTCTGCAGGTTGACCAAAATACCTTTG   | HPT38087_iGS_7.2963_EV   | TACTAGGTCAAGAAGCATCAGTCCCAAGT      |
| HPT38087_iGS_8.1896_FO   | AAAATTTGAACCAATCCCTACCATCTCCTA    | HPT38087_iGS_8.1896_EV   | ACATGGTTAGGAAAATGGTACTCTGATGAT     |
| HPT38087_iGS_9.136_FO    | GAATGAACTATTGGTCCATGTCACAACAA     | HPT38087_iGS_9.136_EV    | ATACACCAGTCAATCCACAGTCAAC          |
| HPT38087_picks_10.479_FO | AGATATCTCATATGCTGCCAATGGGT        | HPT38087_picks_10.479_EV | TATTTCAAAGAATGCTGCCAGAGACGC        |
| HPT38087_picks_1.3647_FO | CACTGTTGGTTAATGACATGCTCACATA      | HPT38087_picks_1.3647_EV | TTGAGAGGCTTTACTACCACATAAGGAGAA     |
| HPT38087_picks_2.1416_FO | GATGTTGTTCTGCCTGTTAGCCTCTGA       | HPT38087_picks_2.1416_EV | GACGCATTGAGAAAAGAAGATCCCACCAA      |
| HPT38087_picks_3.1479_FO | CATGATTCAATTACCTCCACTTGGTCCCG     | HPT38087_picks_3.1479_EV | TCCTACAATTAACCAATAGAGCAGTGGCT      |
| HPT38087_picks_4.2023_FO | TCTCTGTGTAATCAGTAAGGAAATAGGAAGG   | HPT38087_picks_4.2023_EV | CTGTCTTCTTCTATAGTTATAAGCAACCTGTC   |
| HPT38087_picks_5.427_FO  | GACTCCATTTGGATGACAGTAAGGGAAC      | HPT38087_picks_5.427_EV  | GAGACATTTTGTGTTGGAAAACAAGAAGGA     |
| HPT38087_picks_6.393_FO  | GTGAGAATTGAGGCTCTCTTGAC           | HPT38087_picks_6.393_EV  | CACAGGACCTTGCCTTCTCTAT             |
| HPT38087_picks_7.1006_FO | CATGATTCAATTACCTCCAAGTGGTCCCT     | HPT38087_picks_7.1006_EV | GGTCAGACAGAATAATATGGTTTGGCTTA      |
| HPT38087_picks_8.1290_FO | CGAGACTCCAGCTCAAATAATAAAATAT      | HPT38087_picks_8.1290_EV | ACAATTTGAGGCTCAAATGAACTTGGGAAGG    |
| HPT38087_picks_9.1585_FO | CAACATTGTAATTCGGATAGTGACCCAAA     | HPT38087_picks_9.1585_EV | CTGAAGATGAGAGCATATTCCTTATGGCACA    |

# Multiplex NGS Off-target Primers

## crRNA – *EMX1*

*Note - Oligo sequences are absent proprietary 5' tails and chemical modifications*

*“iGS” – Amplicons for GUIDE-seq identified targets*

*“picks” – Amplicons for CRISPOR predicted targets*

## Forward

## Reverse

|                       |                                  |                       |                                      |
|-----------------------|----------------------------------|-----------------------|--------------------------------------|
| EMX1_aGS_1.510_FO     | GGTACTTCATGTCCGTGCTCTTGAC        | EMX1_aGS_1.510_EV     | CACCTGGAGAGTCAGAGGTCACAAT            |
| EMX1_aGS_2.1432_FO    | GGAATAAAGGCGAGGAAGCGGGAGG        | EMX1_aGS_2.1432_EV    | CTGTCTGCCTCTGACGACGAGCAT             |
| EMX1_aGS_3.181_FO     | GGGATGTTCTTCTTGCCCTGGTAGC        | EMX1_aGS_3.181_EV     | ACCATTCACTCCACCTGATCTCGGC            |
| EMX1_iGS_10.1047_FO   | CACACCAGCAATGCTCTCGTCTTG         | EMX1_iGS_10.1047_EV   | CTTGCCCTTCTCTGTACTCTAA               |
| EMX1_iGS_11.688_FO    | CATCAGCTGTTCTGTAGGACATGTG        | EMX1_iGS_11.688_EV    | GGTTAGCCATTACGCTCACATCTC             |
| EMX1_iGS_12.3334_FO   | AGTGGGTGAGGAAATGTTTCAGGAAA       | EMX1_iGS_12.3334_EV   | CCTAGCATTGGAAAGCCTGTCTCTGT           |
| EMX1_iGS_13.2205_FO   | AAGTGAGCTGTGATCACGTGACTGG        | EMX1_iGS_13.2205_EV   | GGCTGAAGCAATCCTCCTACTTCAC            |
| EMX1_iGS_14.767_FO    | GGTTATTGTAGCTTCCTAAGTGGTCCTT     | EMX1_iGS_14.767_EV    | AAGGAAGTCGTTAGAAGACTCTACAGACT        |
| EMX1_iGS_15.1713_FO   | AGCCCAGAAGTTTCTGTAGCCCAAA        | EMX1_iGS_15.1713_EV   | TCTTCGAAAGAGGCAGTGTATGCGC            |
| EMX1_iGS_17.1586_FO   | CTACCATCACAGTCTATGGCGCTTCA       | EMX1_iGS_17.1586_EV   | TGCAGGATTTGGAACAGATGCCAGAG           |
| EMX1_iGS_18.1680_FO   | TCTAACATTATCTCACTCAGAAGCTCCATGTT | EMX1_iGS_18.1680_EV   | GATTTCTTGCTAAATCCTAGAACAGTGGTTTA     |
| EMX1_iGS_19.1953_FO   | CGAAAAAGCGAGACTCTGGAGTCTG        | EMX1_iGS_19.1953_EV   | TTGTAAGGGAGAAGCTGGTGGAGAT            |
| EMX1_iGS_1.2537_FO    | AGGACAAAGTACAAACGGCAGAAGCA       | EMX1_iGS_1.2537_EV    | TTGCCACCCTAGTCATTGGAGGTC             |
| EMX1_iGS_20.1374_FO   | CAGGCAGAGGGATCTTCATATGCTAAC      | EMX1_iGS_20.1374_EV   | AAGTGCAGACCTAATGTTGCCACCAG           |
| EMX1_iGS_2.3261_FO    | AATGTGCTTCAACCCATCACGGCCTA       | EMX1_iGS_2.3261_EV    | CATCAGTGTGGCTTTTCAAGGATGG            |
| EMX1_iGS_3.347_FO     | GAGTCTGACACCTTTTAAGATCTGACAGT    | EMX1_iGS_3.347_EV     | GAAAACTCAAAGAAATGCCCAATCATTGT        |
| EMX1_iGS_4.113_FO     | CCC GGCTTAGGTACAAAGCTCTCG        | EMX1_iGS_4.113_EV     | TATCCCTCACAAACCGTCCCTCG              |
| EMX1_iGS_5.2553_FO    | GAAGACCAGACTCAGTAAAGCCTGGAC      | EMX1_iGS_5.2553_EV    | CCCCAGTCTCTTCTATGTGCACTTG            |
| EMX1_iGS_6.239_FO     | GATGTAGTTCTGACATTCTCCTGAGC       | EMX1_iGS_6.239_EV     | TTTTGGTCAATATCTGAAAGGTTTATTGTA       |
| EMX1_iGS_7.49_FO      | GGGAATAAACTTGTGCTTATTTGTTGGAAGAC | EMX1_iGS_7.49_EV      | TGTTTTAAATTTCTCCACAGTAAAAGAGATATAAAT |
| EMX1_iGS_8.466_FO     | GCTGCTAAAGTGTTAAGAACTCTGAGAAT    | EMX1_iGS_8.466_EV     | TCTGGGACTTTTCTTTGATAAGCCCTTCT        |
| EMX1_iGS_9.1740_FO    | CTAGTCCCTTATGTCACTCACACT         | EMX1_iGS_9.1740_EV    | CAGTCAAATGTGAGCAGAAGCCCTCAG          |
| EMX1_picks_10.2296_FO | GATTCTGTCAAAGTCTCCCTGGCCAAG      | EMX1_picks_10.2296_EV | GTTCCCTCCCTGCATTTCTTTATCACACA        |
| EMX1_picks_1.827_FO   | AGAGGCAAAC TAGGACAACCACTTACT     | EMX1_picks_1.827_EV   | CCGGTCTGAGTGTGGAAGGAACCA             |
| EMX1_picks_2.1783_FO  | GCATCTGAAATCATAACCTCTCACTGACG    | EMX1_picks_2.1783_EV  | TTCTGTCTTCAAGACAGAAGTGCACCTC         |
| EMX1_picks_3.1232_FO  | GTCATGCCTGATCAAACCAATCTGTGT      | EMX1_picks_3.1232_EV  | CAGACACACACAAGGAGTTTTGGAGCAC         |
| EMX1_picks_4.2880_FO  | CAAATCCACTCTGAAGATCAAAGTCATCAT   | EMX1_picks_4.2880_EV  | GAGAAAAC TGAGGAAATGGTAGACTAAGC       |
| EMX1_picks_5.71_FO    | TGTAATGATTCTGCCTTAGAGTCCCAGGA    | EMX1_picks_5.71_EV    | CAGTACTATATTTTATGGCAGGGCATGGC        |
| EMX1_picks_6.14_FO    | TCCTCAGATTTGGAATTTTCTGTCTATA     | EMX1_picks_6.14_EV    | CATTAACAGCAGACTTGATGAAGCAGAAC        |
| EMX1_picks_7.1815_FO  | CAAGTCCAAAGGCTGAAGAAAACCAATC     | EMX1_picks_7.1815_EV  | TGGACCAGTAGATTGAGTAAAGCAGACA         |
| EMX1_picks_8.254_FO   | GCAAGAGAATCGCTTGAACCGGAAGC       | EMX1_picks_8.254_EV   | GGATGTTTCCACACACACAGCCTTG            |
| EMX1_picks_9.525_FO   | TTGCACACTCTGAAGCTATGGCCCAAC      | EMX1_picks_9.525_EV   | GGGAAAAATGTCTCCAGGGAATGCTAGT         |

## Multiplex NGS Off-target Primers crRNA – *HBB*

*Note - Oligo sequences are absent proprietary 5' tails  
and chemical modifications*

*“iGS” – Amplicons for GUIDE-seq identified targets*

*“picks” – Amplicons for CRISPOR predicted targets*

| Forward             |                                   | Reverse             |                                  |
|---------------------|-----------------------------------|---------------------|----------------------------------|
| HBB_picks_10.706_FO | CTGACCCTGATTCTACTCATCATATCTTCTG   | HBB_picks_10.706_EV | AATTCTTAGGTCCCATAAAATCCAAACAGGTA |
| HBB_picks_1.3758_FO | GAGCTGAACTAAGTCTGACCGGTTCA        | HBB_picks_1.3758_EV | AGGGAGACTTACCAGCTTCCCGTAA        |
| HBB_picks_2.1025_FO | GACATAATCAAAGATGTTCAAACTCCACCAAAT | HBB_picks_2.1025_EV | ATTTTCTATGTGGACAAGCATTATGCCAAGCG |
| HBB_picks_3.456_FO  | TGTATGTAACCTGTGATCCCTTCGAAGT      | HBB_picks_3.456_EV  | CTAGAAGGAGGTGTCTGTGAGGTGAAC      |
| HBB_picks_4.1364_FO | CTGAGTGACACAAGCTCCCATGCA          | HBB_picks_4.1364_EV | GCAGAGTTATCAGACACCTGCACGC        |
| HBB_picks_5.2922_FO | TGTCAGTCCTTACTCCTCATCTCTGA        | HBB_picks_5.2922_EV | GATGATCCTGCCACAGTCCAGTGG         |
| HBB_picks_6.125_FO  | TACGACTTAATCACCTCCCACCAGGCG       | HBB_picks_6.125_EV  | TTGGTTTCCTATTACACCTCTCTGGAAGT    |
| HBB_picks_7.304_FO  | TGCAAAACCCATTCTAGGCCACAT          | HBB_picks_7.304_EV  | CACATTGCCCACTTACACCCAGAT         |
| HBB_picks_8.1776_FO | TAATGTGCTATTTGTGTGGGATGCTGAGT     | HBB_picks_8.1776_EV | AATACTTTTTAAGTACCACGGTGACAGA     |
| HBB_picks_9.2245_FO | CTCCCAGAACACTCAGGAACTTCTG         | HBB_picks_9.2245_EV | GCACGAGCTGATTGTCATTCGGAGAT       |
| HBB_SGS_1.1557_FO   | CATGCCAGTTTCTATTGGTCTCCTA         | HBB_SGS_1.1557_EV   | CTAGCAACCTCAAACAGACACCATGC       |
| HBB_SGS_2.2769_FO   | GAAGATCCCAGAGAACTTGGATAGGAAAC     | HBB_SGS_2.2769_EV   | CAGTATGTCCAACCTCCCAAATTGAAAGG    |
| HBB_SGS_3.2533_FO   | GATGAAGGTTGCTAGACAGTAAGGATTGC     | HBB_SGS_3.2533_EV   | CACGCATACACATACATAAACCCCTCTGT    |
| HBB_SGS_4.3843_FO   | TATCTGTGTCATCCCAGGAAAGCTTGA       | HBB_SGS_4.3843_EV   | GTGCACAAAAGTCTCTGTAGAAGGAGAG     |
